# Supplementary material for: Magnetic to the Core – communicating paleomagnetism with hands-on activities
Source: Copernicus journal article supplement (doi:10.5194/gc-2021-41), 2021-11-09
Supplement: Supplementary file 1 [file Supplementary file 2.xlsx]

## Sheet: Responses
Date Collected	Score	Score %	What is a magnetic field?				I am a palaeomagnetist, what do you think I study?				Where in Earth do you think its magnetic field comes from?				What creates the Earth’s magnetic field?				What does the Earth’s magnetic field NOT do?				When were the continents all together in Pangaea?				When in the past do you think compasses would have pointed south instead of north?				How do you think scientists know that compasses would have pointed south in the past?				How do you think scientists who study Earth’s magnetic field typically collect their samples?				Have you visited the stand “Magnetic to the core”?			Do you agree or disagree with the statement: “I learned lots of new things about Earth and its magnetic field?”			Do you intend to find out more about the Earth’s magnetic field?			When did you last read a scientific article that was not about health?
			The thing that makes fridge magnets stick	A force field around electric wires	The thing that makes a compass point north	All of the above	Dinosaurs and fossils	Earth’s magnetic field in the past	The magnetic sense of birds	Antique compasses	The liquid outer core	The ocean floor	The hot rocky mantle	The solid inner core	Lots of little magnets	Hot churning liquid iron	One big magnet	Rusty old lava	Make compasses point north	Tell us about the inside of our planet	Protect satellites in space	Make volcanoes erupt	Two and a half thousand years ago	Two and a half million years ago	Two hundred and fifty million years ago	Two and a half billion years ago	Never	530 years ago	8250 years ago	781,000 years ago	By looking at fossils with a microscope	By measuring rocks with a magnetometer	By reading maps of old explorers	None of the above	They drill them straight from the rock	They find them in a museum collection	They go down a deep mine shaft	They collect them from the bottom of the ocean in a submarine	Not yet	Yes for less than 10 minutes	Yes for more than 10 minutes	Agree	Neither agree nor disagree	Disagree	Definitely	Maybe	Definitely not	In the last week	In the last month
2019-07-07 12:58:40 -0400	5 of 9	55.55			The thing that makes a compass point north			Earth’s magnetic field in the past						The solid inner core		Hot churning liquid iron					Protect satellites in space				Two hundred and fifty million years ago			530 years ago				By measuring rocks with a magnetometer			They drill them straight from the rock						Yes for more than 10 minutes	Agree					Definitely not
2019-07-07 12:53:56 -0400	9 of 9	100				All of the above		Earth’s magnetic field in the past			The liquid outer core					Hot churning liquid iron						Make volcanoes erupt			Two hundred and fifty million years ago					781,000 years ago		By measuring rocks with a magnetometer			They drill them straight from the rock						Yes for more than 10 minutes	Agree			Definitely			In the last week
2019-07-07 12:48:40 -0400	7 of 9	77.77				All of the above		Earth’s magnetic field in the past						The solid inner core			One big magnet					Make volcanoes erupt			Two hundred and fifty million years ago					781,000 years ago		By measuring rocks with a magnetometer			They drill them straight from the rock				Not yet						Definitely			In the last week
2019-07-07 12:39:10 -0400	7 of 9	77.77				All of the above		Earth’s magnetic field in the past						The solid inner core		Hot churning liquid iron						Make volcanoes erupt			Two hundred and fifty million years ago				8250 years ago			By measuring rocks with a magnetometer			They drill them straight from the rock				Not yet							Maybe		In the last week
2019-07-07 12:36:02 -0400	2 of 9	22.22		A force field around electric wires			Dinosaurs and fossils						The hot rocky mantle					Rusty old lava		Tell us about the inside of our planet					Two hundred and fifty million years ago		Never				By looking at fossils with a microscope				They drill them straight from the rock				Not yet						Definitely			In the last week
2019-07-07 12:33:28 -0400	6 of 9	66.66				All of the above		Earth’s magnetic field in the past			The liquid outer core					Hot churning liquid iron						Make volcanoes erupt				Two and a half billion years ago				781,000 years ago	By looking at fossils with a microscope							They collect them from the bottom of the ocean in a submarine	Not yet						Definitely
2019-07-07 12:29:19 -0400	4 of 9	44.44			The thing that makes a compass point north			Earth’s magnetic field in the past						The solid inner core	Lots of little magnets					Tell us about the inside of our planet					Two hundred and fifty million years ago					781,000 years ago	By looking at fossils with a microscope				They drill them straight from the rock				Not yet						Definitely
2019-07-07 12:20:42 -0400	8 of 9	88.88				All of the above		Earth’s magnetic field in the past			The liquid outer core					Hot churning liquid iron						Make volcanoes erupt			Two hundred and fifty million years ago					781,000 years ago		By measuring rocks with a magnetometer				They find them in a museum collection			Not yet						Definitely			In the last week
2019-07-07 12:17:23 -0400	5 of 9	55.55				All of the above	Dinosaurs and fossils							The solid inner core		Hot churning liquid iron						Make volcanoes erupt			Two hundred and fifty million years ago		Never					By measuring rocks with a magnetometer					They go down a deep mine shaft		Not yet						Definitely				In the last month
2019-07-07 12:14:43 -0400	7 of 9	77.77				All of the above		Earth’s magnetic field in the past						The solid inner core		Hot churning liquid iron						Make volcanoes erupt			Two hundred and fifty million years ago					781,000 years ago		By measuring rocks with a magnetometer					They go down a deep mine shaft		Not yet							Maybe		In the last week
2019-07-07 12:11:06 -0400	8 of 9	88.88			The thing that makes a compass point north			Earth’s magnetic field in the past			The liquid outer core					Hot churning liquid iron						Make volcanoes erupt			Two hundred and fifty million years ago					781,000 years ago		By measuring rocks with a magnetometer			They drill them straight from the rock					Yes for less than 10 minutes		Agree			Definitely			In the last week
2019-07-07 12:06:38 -0400	4 of 9	44.44				All of the above	Dinosaurs and fossils							The solid inner core	Lots of little magnets						Protect satellites in space				Two hundred and fifty million years ago				8250 years ago			By measuring rocks with a magnetometer			They drill them straight from the rock					Yes for less than 10 minutes		Agree				Maybe		In the last week
2019-07-07 11:59:31 -0400	6 of 9	66.66		A force field around electric wires			Dinosaurs and fossils							The solid inner core		Hot churning liquid iron						Make volcanoes erupt			Two hundred and fifty million years ago					781,000 years ago		By measuring rocks with a magnetometer			They drill them straight from the rock						Yes for more than 10 minutes	Agree			Definitely
2019-07-07 11:56:21 -0400	0 of 9	0	The thing that makes fridge magnets stick				Dinosaurs and fossils							The solid inner core			One big magnet		Make compasses point north					Two and a half million years ago			Never						By reading maps of old explorers			They find them in a museum collection			Not yet								Definitely not	In the last week
2019-07-07 11:51:18 -0400	8 of 9	88.88				All of the above		Earth’s magnetic field in the past			The liquid outer core					Hot churning liquid iron						Make volcanoes erupt			Two hundred and fifty million years ago				8250 years ago			By measuring rocks with a magnetometer			They drill them straight from the rock				Not yet						Definitely			In the last week
2019-07-07 11:36:49 -0400	5 of 9	55.55				All of the above		Earth’s magnetic field in the past						The solid inner core		Hot churning liquid iron						Make volcanoes erupt				Two and a half billion years ago			8250 years ago			By measuring rocks with a magnetometer				They find them in a museum collection				Yes for less than 10 minutes		Agree			Definitely			In the last week
2019-07-07 11:31:35 -0400	3 of 9	33.33		A force field around electric wires				Earth’s magnetic field in the past						The solid inner core	Lots of little magnets					Tell us about the inside of our planet				Two and a half million years ago						781,000 years ago		By measuring rocks with a magnetometer						They collect them from the bottom of the ocean in a submarine	Not yet						Definitely
2019-07-07 11:15:56 -0400	2 of 9	22.22		A force field around electric wires				Earth’s magnetic field in the past						The solid inner core			One big magnet					Make volcanoes erupt				Two and a half billion years ago	Never						By reading maps of old explorers					They collect them from the bottom of the ocean in a submarine	Not yet						Definitely			In the last week
2019-07-07 11:09:52 -0400	5 of 9	55.55				All of the above		Earth’s magnetic field in the past						The solid inner core		Hot churning liquid iron						Make volcanoes erupt		Two and a half million years ago			Never					By measuring rocks with a magnetometer					They go down a deep mine shaft			Yes for less than 10 minutes		Agree			Definitely			In the last week
2019-07-07 11:06:15 -0400	5 of 9	55.55		A force field around electric wires			Dinosaurs and fossils							The solid inner core		Hot churning liquid iron						Make volcanoes erupt			Two hundred and fifty million years ago				8250 years ago			By measuring rocks with a magnetometer			They drill them straight from the rock				Not yet							Maybe			In the last month
2019-07-07 11:03:27 -0400	3 of 9	33.33		A force field around electric wires				Earth’s magnetic field in the past					The hot rocky mantle			Hot churning liquid iron				Tell us about the inside of our planet				Two and a half million years ago			Never					By measuring rocks with a magnetometer						They collect them from the bottom of the ocean in a submarine	Not yet						Definitely
2019-07-07 11:00:25 -0400	4 of 9	44.44		A force field around electric wires				Earth’s magnetic field in the past			The liquid outer core				Lots of little magnets						Protect satellites in space				Two hundred and fifty million years ago			530 years ago						None of the above	They drill them straight from the rock						Yes for more than 10 minutes	Agree			Definitely			In the last week
2019-07-07 10:55:17 -0400	4 of 9	44.44				All of the above		Earth’s magnetic field in the past						The solid inner core	Lots of little magnets					Tell us about the inside of our planet						Two and a half billion years ago	Never					By measuring rocks with a magnetometer			They drill them straight from the rock				Not yet						Definitely			In the last week
2019-07-07 10:51:47 -0400	8 of 9	88.88				All of the above		Earth’s magnetic field in the past			The liquid outer core					Hot churning liquid iron						Make volcanoes erupt			Two hundred and fifty million years ago					781,000 years ago	By looking at fossils with a microscope				They drill them straight from the rock				Not yet						Definitely			In the last week
2019-07-07 10:47:41 -0400	4 of 9	44.44		A force field around electric wires				Earth’s magnetic field in the past						The solid inner core		Hot churning liquid iron						Make volcanoes erupt			Two hundred and fifty million years ago		Never						By reading maps of old explorers					They collect them from the bottom of the ocean in a submarine		Yes for less than 10 minutes		Agree				Maybe		In the last week
2019-07-07 10:43:03 -0400	5 of 9	55.55				All of the above		Earth’s magnetic field in the past				The ocean floor			Lots of little magnets							Make volcanoes erupt				Two and a half billion years ago		530 years ago				By measuring rocks with a magnetometer			They drill them straight from the rock				Not yet							Maybe		In the last week
2019-07-07 10:31:34 -0400	6 of 9	66.66				All of the above		Earth’s magnetic field in the past			The liquid outer core					Hot churning liquid iron						Make volcanoes erupt				Two and a half billion years ago			8250 years ago			By measuring rocks with a magnetometer					They go down a deep mine shaft		Not yet						Definitely			In the last week
2019-07-07 10:24:30 -0400	5 of 9	55.55				All of the above		Earth’s magnetic field in the past					The hot rocky mantle				One big magnet		Make compasses point north						Two hundred and fifty million years ago			530 years ago				By measuring rocks with a magnetometer			They drill them straight from the rock					Yes for less than 10 minutes		Agree			Definitely			In the last week
2019-07-07 10:10:53 -0400	9 of 9	100				All of the above		Earth’s magnetic field in the past			The liquid outer core					Hot churning liquid iron						Make volcanoes erupt			Two hundred and fifty million years ago					781,000 years ago		By measuring rocks with a magnetometer			They drill them straight from the rock						Yes for more than 10 minutes	Agree			Definitely			In the last week
2019-07-07 10:04:03 -0400	5 of 9	55.55			The thing that makes a compass point north			Earth’s magnetic field in the past			The liquid outer core					Hot churning liquid iron					Protect satellites in space					Two and a half billion years ago				781,000 years ago		By measuring rocks with a magnetometer						They collect them from the bottom of the ocean in a submarine		Yes for less than 10 minutes		Agree			Definitely			In the last week
2019-07-07 09:54:04 -0400	6 of 9	66.66				All of the above		Earth’s magnetic field in the past						The solid inner core		Hot churning liquid iron						Make volcanoes erupt		Two and a half million years ago					8250 years ago			By measuring rocks with a magnetometer			They drill them straight from the rock					Yes for less than 10 minutes		Agree			Definitely			In the last week
2019-07-07 09:51:18 -0400	5 of 9	55.55				All of the above		Earth’s magnetic field in the past						The solid inner core	Lots of little magnets							Make volcanoes erupt		Two and a half million years ago			Never					By measuring rocks with a magnetometer			They drill them straight from the rock						Yes for more than 10 minutes	Agree			Definitely				In the last month
2019-07-07 09:46:16 -0400	2 of 9	22.22		A force field around electric wires						Antique compasses	The liquid outer core						One big magnet				Protect satellites in space				Two hundred and fifty million years ago		Never				By looking at fossils with a microscope							They collect them from the bottom of the ocean in a submarine	Not yet						Definitely				In the last month
2019-07-07 09:29:29 -0400	2 of 9	22.22			The thing that makes a compass point north			Earth’s magnetic field in the past						The solid inner core		Hot churning liquid iron					Protect satellites in space					Two and a half billion years ago	Never						By reading maps of old explorers					They collect them from the bottom of the ocean in a submarine	Not yet							Maybe
2019-07-07 09:23:45 -0400	4 of 9	44.44		A force field around electric wires				Earth’s magnetic field in the past			The liquid outer core					Hot churning liquid iron					Protect satellites in space				Two hundred and fifty million years ago				8250 years ago				By reading maps of old explorers					They collect them from the bottom of the ocean in a submarine	Not yet						Definitely			In the last week
2019-07-07 09:11:09 -0400	6 of 9	66.66			The thing that makes a compass point north			Earth’s magnetic field in the past						The solid inner core		Hot churning liquid iron						Make volcanoes erupt				Two and a half billion years ago				781,000 years ago		By measuring rocks with a magnetometer			They drill them straight from the rock						Yes for more than 10 minutes	Agree				Maybe
2019-07-07 09:03:42 -0400	6 of 9	66.66			The thing that makes a compass point north			Earth’s magnetic field in the past						The solid inner core		Hot churning liquid iron						Make volcanoes erupt		Two and a half million years ago						781,000 years ago		By measuring rocks with a magnetometer			They drill them straight from the rock					Yes for less than 10 minutes		Agree				Maybe		In the last week
2019-07-07 08:57:52 -0400	5 of 9	55.55				All of the above		Earth’s magnetic field in the past						The solid inner core		Hot churning liquid iron						Make volcanoes erupt			Two hundred and fifty million years ago		Never							None of the above			They go down a deep mine shaft		Not yet						Definitely			In the last week
2019-07-07 08:49:45 -0400	5 of 9	55.55				All of the above	Dinosaurs and fossils				The liquid outer core					Hot churning liquid iron						Make volcanoes erupt				Two and a half billion years ago				781,000 years ago				None of the above				They collect them from the bottom of the ocean in a submarine	Not yet							Maybe		In the last week
2019-07-07 08:46:17 -0400	6 of 9	66.66			The thing that makes a compass point north			Earth’s magnetic field in the past						The solid inner core		Hot churning liquid iron						Make volcanoes erupt				Two and a half billion years ago				781,000 years ago		By measuring rocks with a magnetometer			They drill them straight from the rock					Yes for less than 10 minutes			Neither agree nor disagree		Definitely			In the last week
2019-07-07 08:37:53 -0400	7 of 9	77.77				All of the above		Earth’s magnetic field in the past			The liquid outer core					Hot churning liquid iron						Make volcanoes erupt			Two hundred and fifty million years ago				8250 years ago			By measuring rocks with a magnetometer						They collect them from the bottom of the ocean in a submarine	Not yet						Definitely
2019-07-07 08:35:04 -0400	7 of 9	77.77				All of the above		Earth’s magnetic field in the past						The solid inner core		Hot churning liquid iron						Make volcanoes erupt				Two and a half billion years ago				781,000 years ago		By measuring rocks with a magnetometer			They drill them straight from the rock				Not yet						Definitely
2019-07-07 08:24:30 -0400	2 of 9	22.22	The thing that makes fridge magnets stick				Dinosaurs and fossils							The solid inner core		Hot churning liquid iron						Make volcanoes erupt		Two and a half million years ago			Never						By reading maps of old explorers					They collect them from the bottom of the ocean in a submarine	Not yet						Definitely				In the last month
2019-07-07 08:04:07 -0400	6 of 9	66.66				All of the above		Earth’s magnetic field in the past						The solid inner core			One big magnet					Make volcanoes erupt				Two and a half billion years ago				781,000 years ago		By measuring rocks with a magnetometer			They drill them straight from the rock						Yes for more than 10 minutes	Agree			Definitely				In the last month
2019-07-07 07:59:54 -0400	7 of 9	77.77				All of the above		Earth’s magnetic field in the past			The liquid outer core					Hot churning liquid iron						Make volcanoes erupt				Two and a half billion years ago				781,000 years ago		By measuring rocks with a magnetometer					They go down a deep mine shaft		Not yet						Definitely			In the last week
2019-07-07 07:55:13 -0400	9 of 9	100				All of the above		Earth’s magnetic field in the past			The liquid outer core					Hot churning liquid iron						Make volcanoes erupt			Two hundred and fifty million years ago					781,000 years ago		By measuring rocks with a magnetometer			They drill them straight from the rock						Yes for more than 10 minutes	Agree			Definitely			In the last week
2019-07-07 07:44:15 -0400	4 of 9	44.44				All of the above		Earth’s magnetic field in the past						The solid inner core			One big magnet					Make volcanoes erupt				Two and a half billion years ago	Never							None of the above	They drill them straight from the rock				Not yet							Maybe		In the last week
2019-07-07 07:40:31 -0400	3 of 9	33.33				All of the above		Earth’s magnetic field in the past						The solid inner core			One big magnet					Make volcanoes erupt				Two and a half billion years ago			8250 years ago					None of the above				They collect them from the bottom of the ocean in a submarine	Not yet						Definitely			In the last week
2019-07-07 07:34:41 -0400	4 of 9	44.44			The thing that makes a compass point north			Earth’s magnetic field in the past						The solid inner core		Hot churning liquid iron						Make volcanoes erupt		Two and a half million years ago			Never					By measuring rocks with a magnetometer					They go down a deep mine shaft		Not yet						Definitely
2019-07-07 07:29:39 -0400	6 of 9	66.66			The thing that makes a compass point north			Earth’s magnetic field in the past			The liquid outer core					Hot churning liquid iron						Make volcanoes erupt				Two and a half billion years ago				781,000 years ago		By measuring rocks with a magnetometer					They go down a deep mine shaft				Yes for more than 10 minutes	Agree				Maybe			In the last month
2019-07-07 07:25:50 -0400	9 of 9	100				All of the above		Earth’s magnetic field in the past			The liquid outer core					Hot churning liquid iron						Make volcanoes erupt			Two hundred and fifty million years ago					781,000 years ago		By measuring rocks with a magnetometer			They drill them straight from the rock						Yes for more than 10 minutes	Agree			Definitely				In the last month
2019-07-07 07:20:09 -0400	4 of 9	44.44				All of the above		Earth’s magnetic field in the past						The solid inner core	Lots of little magnets							Make volcanoes erupt				Two and a half billion years ago	Never							None of the above	They drill them straight from the rock					Yes for less than 10 minutes			Neither agree nor disagree			Maybe		In the last week
2019-07-07 07:13:58 -0400	5 of 9	55.55				All of the above		Earth’s magnetic field in the past					The hot rocky mantle			Hot churning liquid iron					Protect satellites in space					Two and a half billion years ago				781,000 years ago		By measuring rocks with a magnetometer					They go down a deep mine shaft			Yes for less than 10 minutes			Neither agree nor disagree			Maybe		In the last week
2019-07-07 07:07:04 -0400	4 of 9	44.44				All of the above	Dinosaurs and fossils				The liquid outer core				Lots of little magnets					Tell us about the inside of our planet					Two hundred and fifty million years ago					781,000 years ago	By looking at fossils with a microscope					They find them in a museum collection			Not yet							Maybe
2019-07-07 07:02:18 -0400	7 of 9	77.77				All of the above		Earth’s magnetic field in the past						The solid inner core		Hot churning liquid iron						Make volcanoes erupt		Two and a half million years ago						781,000 years ago		By measuring rocks with a magnetometer			They drill them straight from the rock				Not yet						Definitely			In the last week
2019-07-07 06:51:22 -0400	6 of 9	66.66				All of the above		Earth’s magnetic field in the past			The liquid outer core					Hot churning liquid iron					Protect satellites in space					Two and a half billion years ago				781,000 years ago		By measuring rocks with a magnetometer					They go down a deep mine shaft			Yes for less than 10 minutes		Agree			Definitely				In the last month
2019-07-07 06:43:21 -0400	5 of 9	55.55				All of the above		Earth’s magnetic field in the past						The solid inner core		Hot churning liquid iron				Tell us about the inside of our planet					Two hundred and fifty million years ago		Never					By measuring rocks with a magnetometer						They collect them from the bottom of the ocean in a submarine	Not yet						Definitely
2019-07-07 06:38:06 -0400	3 of 9	33.33				All of the above	Dinosaurs and fossils							The solid inner core	Lots of little magnets						Protect satellites in space					Two and a half billion years ago			8250 years ago			By measuring rocks with a magnetometer			They drill them straight from the rock				Not yet						Definitely			In the last week
2019-07-07 06:33:42 -0400	9 of 9	100				All of the above		Earth’s magnetic field in the past			The liquid outer core					Hot churning liquid iron						Make volcanoes erupt			Two hundred and fifty million years ago					781,000 years ago		By measuring rocks with a magnetometer			They drill them straight from the rock				Not yet						Definitely			In the last week
2019-07-07 06:02:23 -0400	6 of 9	66.66			The thing that makes a compass point north			Earth’s magnetic field in the past						The solid inner core		Hot churning liquid iron					Protect satellites in space				Two hundred and fifty million years ago					781,000 years ago		By measuring rocks with a magnetometer			They drill them straight from the rock					Yes for less than 10 minutes		Agree				Maybe		In the last week
2019-07-07 05:59:48 -0400	9 of 9	100				All of the above		Earth’s magnetic field in the past			The liquid outer core					Hot churning liquid iron						Make volcanoes erupt			Two hundred and fifty million years ago					781,000 years ago		By measuring rocks with a magnetometer			They drill them straight from the rock					Yes for less than 10 minutes		Agree			Definitely				In the last month
2019-07-07 05:51:55 -0400	6 of 9	66.66			The thing that makes a compass point north			Earth’s magnetic field in the past						The solid inner core		Hot churning liquid iron				Tell us about the inside of our planet					Two hundred and fifty million years ago					781,000 years ago		By measuring rocks with a magnetometer			They drill them straight from the rock					Yes for less than 10 minutes		Agree			Definitely			In the last week
2019-07-07 05:45:16 -0400	6 of 9	66.66			The thing that makes a compass point north			Earth’s magnetic field in the past			The liquid outer core					Hot churning liquid iron					Protect satellites in space				Two hundred and fifty million years ago					781,000 years ago		By measuring rocks with a magnetometer					They go down a deep mine shaft				Yes for more than 10 minutes	Agree			Definitely
2019-07-07 05:38:01 -0400	7 of 9	77.77				All of the above		Earth’s magnetic field in the past						The solid inner core		Hot churning liquid iron						Make volcanoes erupt			Two hundred and fifty million years ago					781,000 years ago				None of the above	They drill them straight from the rock				Not yet						Definitely			In the last week
2019-07-07 05:32:44 -0400	6 of 9	66.66				All of the above		Earth’s magnetic field in the past						The solid inner core		Hot churning liquid iron					Protect satellites in space				Two hundred and fifty million years ago					781,000 years ago	By looking at fossils with a microscope				They drill them straight from the rock				Not yet							Maybe			In the last month
2019-07-07 05:25:46 -0400	7 of 9	77.77				All of the above		Earth’s magnetic field in the past						The solid inner core		Hot churning liquid iron						Make volcanoes erupt				Two and a half billion years ago				781,000 years ago		By measuring rocks with a magnetometer			They drill them straight from the rock				Not yet							Maybe		In the last week
2019-07-07 05:17:50 -0400	4 of 9	44.44		A force field around electric wires				Earth’s magnetic field in the past					The hot rocky mantle		Lots of little magnets				Make compasses point north						Two hundred and fifty million years ago		Never					By measuring rocks with a magnetometer			They drill them straight from the rock				Not yet						Definitely
2019-07-06 12:45:53 -0400	7 of 9	77.77				All of the above		Earth’s magnetic field in the past						The solid inner core		Hot churning liquid iron						Make volcanoes erupt				Two and a half billion years ago				781,000 years ago		By measuring rocks with a magnetometer			They drill them straight from the rock						Yes for more than 10 minutes	Agree			Definitely			In the last week
2019-07-06 12:38:53 -0400	8 of 9	88.88				All of the above		Earth’s magnetic field in the past			The liquid outer core					Hot churning liquid iron						Make volcanoes erupt			Two hundred and fifty million years ago				8250 years ago			By measuring rocks with a magnetometer			They drill them straight from the rock						Yes for more than 10 minutes	Agree				Maybe		In the last week
2019-07-06 12:29:03 -0400	5 of 9	55.55				All of the above		Earth’s magnetic field in the past						The solid inner core		Hot churning liquid iron						Make volcanoes erupt				Two and a half billion years ago			8250 years ago		By looking at fossils with a microscope				They drill them straight from the rock				Not yet						Definitely				In the last month
2019-07-06 12:13:48 -0400	7 of 9	77.77				All of the above		Earth’s magnetic field in the past						The solid inner core		Hot churning liquid iron						Make volcanoes erupt			Two hundred and fifty million years ago				8250 years ago			By measuring rocks with a magnetometer			They drill them straight from the rock				Not yet							Maybe		In the last week
2019-07-06 12:08:58 -0400	4 of 9	44.44				All of the above		Earth’s magnetic field in the past						The solid inner core		Hot churning liquid iron				Tell us about the inside of our planet						Two and a half billion years ago	Never					By measuring rocks with a magnetometer					They go down a deep mine shaft		Not yet						Definitely
2019-07-06 12:03:34 -0400	6 of 9	66.66				All of the above		Earth’s magnetic field in the past						The solid inner core		Hot churning liquid iron						Make volcanoes erupt		Two and a half million years ago						781,000 years ago	By looking at fossils with a microscope				They drill them straight from the rock				Not yet						Definitely			In the last week
2019-07-06 11:52:47 -0400	7 of 9	77.77				All of the above		Earth’s magnetic field in the past						The solid inner core		Hot churning liquid iron					Protect satellites in space				Two hundred and fifty million years ago					781,000 years ago		By measuring rocks with a magnetometer			They drill them straight from the rock				Not yet						Definitely				In the last month
2019-07-06 11:42:00 -0400	6 of 9	66.66				All of the above		Earth’s magnetic field in the past			The liquid outer core					Hot churning liquid iron					Protect satellites in space					Two and a half billion years ago			8250 years ago			By measuring rocks with a magnetometer			They drill them straight from the rock				Not yet						Definitely				In the last month
2019-07-06 11:32:47 -0400	4 of 9	44.44				All of the above	Dinosaurs and fossils							The solid inner core		Hot churning liquid iron				Tell us about the inside of our planet						Two and a half billion years ago			8250 years ago			By measuring rocks with a magnetometer			They drill them straight from the rock					Yes for less than 10 minutes		Agree			Definitely
2019-07-06 11:25:25 -0400	9 of 9	100				All of the above		Earth’s magnetic field in the past			The liquid outer core					Hot churning liquid iron						Make volcanoes erupt			Two hundred and fifty million years ago					781,000 years ago		By measuring rocks with a magnetometer			They drill them straight from the rock					Yes for less than 10 minutes		Agree				Maybe		In the last week
2019-07-06 11:17:30 -0400	4 of 9	44.44				All of the above	Dinosaurs and fossils							The solid inner core		Hot churning liquid iron						Make volcanoes erupt				Two and a half billion years ago	Never					By measuring rocks with a magnetometer						They collect them from the bottom of the ocean in a submarine	Not yet						Definitely			In the last week
2019-07-06 11:06:00 -0400	7 of 9	77.77				All of the above		Earth’s magnetic field in the past						The solid inner core		Hot churning liquid iron						Make volcanoes erupt			Two hundred and fifty million years ago			530 years ago				By measuring rocks with a magnetometer			They drill them straight from the rock				Not yet						Definitely			In the last week
2019-07-06 11:00:37 -0400	8 of 9	88.88				All of the above		Earth’s magnetic field in the past			The liquid outer core					Hot churning liquid iron						Make volcanoes erupt			Two hundred and fifty million years ago					781,000 years ago		By measuring rocks with a magnetometer						They collect them from the bottom of the ocean in a submarine			Yes for more than 10 minutes	Agree			Definitely			In the last week
2019-07-06 10:57:27 -0400	7 of 9	77.77				All of the above		Earth’s magnetic field in the past					The hot rocky mantle			Hot churning liquid iron						Make volcanoes erupt			Two hundred and fifty million years ago					781,000 years ago				None of the above	They drill them straight from the rock				Not yet						Definitely			In the last week
2019-07-06 10:51:10 -0400	9 of 9	100				All of the above		Earth’s magnetic field in the past			The liquid outer core					Hot churning liquid iron						Make volcanoes erupt			Two hundred and fifty million years ago					781,000 years ago		By measuring rocks with a magnetometer			They drill them straight from the rock					Yes for less than 10 minutes		Agree			Definitely				In the last month
2019-07-06 10:46:48 -0400	7 of 9	77.77				All of the above		Earth’s magnetic field in the past			The liquid outer core					Hot churning liquid iron						Make volcanoes erupt		Two and a half million years ago					8250 years ago			By measuring rocks with a magnetometer			They drill them straight from the rock					Yes for less than 10 minutes		Agree			Definitely			In the last week
2019-07-06 10:38:11 -0400	6 of 9	66.66				All of the above		Earth’s magnetic field in the past					The hot rocky mantle			Hot churning liquid iron						Make volcanoes erupt			Two hundred and fifty million years ago					781,000 years ago				None of the above			They go down a deep mine shaft		Not yet						Definitely			In the last week
2019-07-06 10:29:21 -0400	5 of 9	55.55				All of the above	Dinosaurs and fossils							The solid inner core		Hot churning liquid iron					Protect satellites in space				Two hundred and fifty million years ago		Never					By measuring rocks with a magnetometer			They drill them straight from the rock				Not yet						Definitely
2019-07-06 10:23:01 -0400	9 of 9	100				All of the above		Earth’s magnetic field in the past			The liquid outer core					Hot churning liquid iron						Make volcanoes erupt			Two hundred and fifty million years ago					781,000 years ago		By measuring rocks with a magnetometer			They drill them straight from the rock						Yes for more than 10 minutes	Agree			Definitely				In the last month
2019-07-06 10:14:46 -0400	7 of 9	77.77				All of the above		Earth’s magnetic field in the past						The solid inner core		Hot churning liquid iron						Make volcanoes erupt			Two hundred and fifty million years ago					781,000 years ago		By measuring rocks with a magnetometer					They go down a deep mine shaft		Not yet						Definitely			In the last week
2019-07-06 09:53:34 -0400	4 of 9	44.44				All of the above		Earth’s magnetic field in the past						The solid inner core				Rusty old lava				Make volcanoes erupt				Two and a half billion years ago	Never					By measuring rocks with a magnetometer					They go down a deep mine shaft		Not yet						Definitely
2019-07-06 09:35:57 -0400	5 of 9	55.55		A force field around electric wires				Earth’s magnetic field in the past						The solid inner core		Hot churning liquid iron						Make volcanoes erupt		Two and a half million years ago			Never					By measuring rocks with a magnetometer			They drill them straight from the rock				Not yet						Definitely				In the last month
2019-07-06 09:30:09 -0400	4 of 9	44.44				All of the above		Earth’s magnetic field in the past					The hot rocky mantle		Lots of little magnets							Make volcanoes erupt		Two and a half million years ago			Never						By reading maps of old explorers		They drill them straight from the rock				Not yet							Maybe
2019-07-06 09:23:49 -0400	3 of 9	33.33			The thing that makes a compass point north			Earth’s magnetic field in the past						The solid inner core		Hot churning liquid iron						Make volcanoes erupt		Two and a half million years ago			Never						By reading maps of old explorers					They collect them from the bottom of the ocean in a submarine	Not yet							Maybe		In the last week
2019-07-06 09:15:53 -0400	9 of 9	100				All of the above		Earth’s magnetic field in the past			The liquid outer core					Hot churning liquid iron						Make volcanoes erupt			Two hundred and fifty million years ago					781,000 years ago		By measuring rocks with a magnetometer			They drill them straight from the rock						Yes for more than 10 minutes	Agree				Maybe		In the last week
2019-07-06 09:12:07 -0400	5 of 9	55.55				All of the above		Earth’s magnetic field in the past						The solid inner core	Lots of little magnets							Make volcanoes erupt				Two and a half billion years ago	Never					By measuring rocks with a magnetometer			They drill them straight from the rock				Not yet						Definitely				In the last month
2019-07-06 09:03:56 -0400	7 of 9	77.77				All of the above		Earth’s magnetic field in the past			The liquid outer core					Hot churning liquid iron						Make volcanoes erupt				Two and a half billion years ago			8250 years ago			By measuring rocks with a magnetometer			They drill them straight from the rock				Not yet						Definitely			In the last week
2019-07-06 08:51:40 -0400	8 of 9	88.88				All of the above		Earth’s magnetic field in the past			The liquid outer core					Hot churning liquid iron						Make volcanoes erupt			Two hundred and fifty million years ago				8250 years ago			By measuring rocks with a magnetometer			They drill them straight from the rock				Not yet						Definitely			In the last week
2019-07-06 08:48:51 -0400	9 of 9	100				All of the above		Earth’s magnetic field in the past			The liquid outer core					Hot churning liquid iron						Make volcanoes erupt			Two hundred and fifty million years ago					781,000 years ago		By measuring rocks with a magnetometer			They drill them straight from the rock						Yes for more than 10 minutes	Agree			Definitely			In the last week
2019-07-06 08:39:25 -0400	5 of 9	55.55				All of the above		Earth’s magnetic field in the past			The liquid outer core					Hot churning liquid iron						Make volcanoes erupt				Two and a half billion years ago			8250 years ago					None of the above				They collect them from the bottom of the ocean in a submarine	Not yet						Definitely
2019-07-06 08:26:40 -0400	6 of 9	66.66				All of the above	Dinosaurs and fossils				The liquid outer core					Hot churning liquid iron						Make volcanoes erupt				Two and a half billion years ago		530 years ago				By measuring rocks with a magnetometer			They drill them straight from the rock					Yes for less than 10 minutes		Agree			Definitely
2019-07-06 08:19:54 -0400	6 of 9	66.66				All of the above	Dinosaurs and fossils				The liquid outer core					Hot churning liquid iron						Make volcanoes erupt			Two hundred and fifty million years ago				8250 years ago			By measuring rocks with a magnetometer				They find them in a museum collection					Yes for more than 10 minutes	Agree			Definitely			In the last week
2019-07-06 08:14:10 -0400	3 of 9	33.33				All of the above		Earth’s magnetic field in the past						The solid inner core	Lots of little magnets						Protect satellites in space					Two and a half billion years ago	Never								They drill them straight from the rock					Yes for less than 10 minutes		Agree			Definitely				In the last month
2019-07-06 08:07:40 -0400	5 of 9	55.55			The thing that makes a compass point north		Dinosaurs and fossils						The hot rocky mantle			Hot churning liquid iron					Protect satellites in space				Two hundred and fifty million years ago					781,000 years ago		By measuring rocks with a magnetometer			They drill them straight from the rock					Yes for less than 10 minutes		Agree			Definitely
2019-07-06 07:58:41 -0400	6 of 9	66.66				All of the above		Earth’s magnetic field in the past			The liquid outer core					Hot churning liquid iron						Make volcanoes erupt			Two hundred and fifty million years ago		Never				By looking at fossils with a microscope						They go down a deep mine shaft		Not yet						Definitely				In the last month
2019-07-06 07:52:36 -0400	4 of 9	44.44			The thing that makes a compass point north			Earth’s magnetic field in the past						The solid inner core		Hot churning liquid iron				Tell us about the inside of our planet				Two and a half million years ago					8250 years ago			By measuring rocks with a magnetometer			They drill them straight from the rock					Yes for less than 10 minutes		Agree			Definitely
2019-07-06 07:47:01 -0400	7 of 9	77.77				All of the above		Earth’s magnetic field in the past						The solid inner core		Hot churning liquid iron						Make volcanoes erupt			Two hundred and fifty million years ago				8250 years ago			By measuring rocks with a magnetometer			They drill them straight from the rock						Yes for more than 10 minutes	Agree			Definitely			In the last week
2019-07-06 07:42:45 -0400	4 of 9	44.44				All of the above		Earth’s magnetic field in the past						The solid inner core		Hot churning liquid iron						Make volcanoes erupt				Two and a half billion years ago	Never							None of the above			They go down a deep mine shaft		Not yet							Maybe
2019-07-06 07:36:54 -0400	5 of 9	55.55				All of the above		Earth’s magnetic field in the past						The solid inner core		Hot churning liquid iron						Make volcanoes erupt				Two and a half billion years ago	Never							None of the above	They drill them straight from the rock				Not yet						Definitely				In the last month
2019-07-06 07:28:50 -0400	9 of 9	100				All of the above		Earth’s magnetic field in the past			The liquid outer core					Hot churning liquid iron						Make volcanoes erupt			Two hundred and fifty million years ago					781,000 years ago		By measuring rocks with a magnetometer			They drill them straight from the rock						Yes for more than 10 minutes		Neither agree nor disagree		Definitely			In the last week
2019-07-06 07:24:23 -0400	4 of 9	44.44			The thing that makes a compass point north			Earth’s magnetic field in the past						The solid inner core			One big magnet					Make volcanoes erupt			Two hundred and fifty million years ago		Never							None of the above	They drill them straight from the rock				Not yet						Definitely			In the last week
2019-07-06 07:19:05 -0400	6 of 9	66.66				All of the above		Earth’s magnetic field in the past						The solid inner core			One big magnet					Make volcanoes erupt				Two and a half billion years ago				781,000 years ago		By measuring rocks with a magnetometer			They drill them straight from the rock				Not yet						Definitely			In the last week
2019-07-06 07:15:28 -0400	3 of 9	33.33			The thing that makes a compass point north			Earth’s magnetic field in the past						The solid inner core				Rusty old lava			Protect satellites in space					Two and a half billion years ago				781,000 years ago		By measuring rocks with a magnetometer					They go down a deep mine shaft			Yes for less than 10 minutes			Neither agree nor disagree			Maybe		In the last week
2019-07-06 07:08:42 -0400	5 of 9	55.55				All of the above		Earth’s magnetic field in the past			The liquid outer core				Lots of little magnets					Tell us about the inside of our planet						Two and a half billion years ago				781,000 years ago		By measuring rocks with a magnetometer						They collect them from the bottom of the ocean in a submarine		Yes for less than 10 minutes		Agree			Definitely			In the last week
2019-07-06 06:53:31 -0400	7 of 9	77.77				All of the above		Earth’s magnetic field in the past						The solid inner core		Hot churning liquid iron						Make volcanoes erupt			Two hundred and fifty million years ago				8250 years ago			By measuring rocks with a magnetometer			They drill them straight from the rock				Not yet						Definitely				In the last month
2019-07-06 06:50:11 -0400	8 of 9	88.88				All of the above		Earth’s magnetic field in the past						The solid inner core		Hot churning liquid iron						Make volcanoes erupt			Two hundred and fifty million years ago					781,000 years ago		By measuring rocks with a magnetometer			They drill them straight from the rock						Yes for more than 10 minutes	Agree			Definitely			In the last week
2019-07-06 06:46:02 -0400	2 of 9	22.22			The thing that makes a compass point north			Earth’s magnetic field in the past						The solid inner core	Lots of little magnets							Make volcanoes erupt				Two and a half billion years ago			8250 years ago				By reading maps of old explorers				They go down a deep mine shaft			Yes for less than 10 minutes		Agree			Definitely				In the last month
2019-07-06 06:43:03 -0400	3 of 9	33.33				All of the above		Earth’s magnetic field in the past						The solid inner core			One big magnet					Make volcanoes erupt				Two and a half billion years ago	Never							None of the above			They go down a deep mine shaft			Yes for less than 10 minutes		Agree			Definitely
2019-07-06 06:22:55 -0400	6 of 9	66.66				All of the above		Earth’s magnetic field in the past						The solid inner core		Hot churning liquid iron						Make volcanoes erupt				Two and a half billion years ago			8250 years ago			By measuring rocks with a magnetometer			They drill them straight from the rock				Not yet						Definitely
2019-07-06 06:12:11 -0400	4 of 9	44.44				All of the above		Earth’s magnetic field in the past						The solid inner core		Hot churning liquid iron			Make compasses point north							Two and a half billion years ago			8250 years ago			By measuring rocks with a magnetometer						They collect them from the bottom of the ocean in a submarine	Not yet						Definitely			In the last week
2019-07-06 06:01:43 -0400	6 of 9	66.66				All of the above		Earth’s magnetic field in the past			The liquid outer core					Hot churning liquid iron				Tell us about the inside of our planet						Two and a half billion years ago			8250 years ago			By measuring rocks with a magnetometer			They drill them straight from the rock				Not yet						Definitely			In the last week
2019-07-06 05:39:57 -0400	5 of 9	55.55			The thing that makes a compass point north			Earth’s magnetic field in the past					The hot rocky mantle			Hot churning liquid iron						Make volcanoes erupt				Two and a half billion years ago			8250 years ago			By measuring rocks with a magnetometer			They drill them straight from the rock					Yes for less than 10 minutes		Agree			Definitely			In the last week
2019-07-06 05:32:44 -0400	4 of 9	44.44	The thing that makes fridge magnets stick						The magnetic sense of birds				The hot rocky mantle				One big magnet					Make volcanoes erupt			Two hundred and fifty million years ago					781,000 years ago		By measuring rocks with a magnetometer						They collect them from the bottom of the ocean in a submarine		Yes for less than 10 minutes		Agree			Definitely
2019-07-06 05:26:23 -0400	7 of 9	77.77				All of the above		Earth’s magnetic field in the past			The liquid outer core					Hot churning liquid iron						Make volcanoes erupt				Two and a half billion years ago				781,000 years ago		By measuring rocks with a magnetometer					They go down a deep mine shaft				Yes for more than 10 minutes	Agree			Definitely			In the last week
2019-07-06 05:22:09 -0400	7 of 9	77.77				All of the above		Earth’s magnetic field in the past					The hot rocky mantle			Hot churning liquid iron						Make volcanoes erupt				Two and a half billion years ago				781,000 years ago		By measuring rocks with a magnetometer			They drill them straight from the rock				Not yet						Definitely			In the last week
2019-07-06 05:11:46 -0400	5 of 9	55.55			The thing that makes a compass point north			Earth’s magnetic field in the past						The solid inner core		Hot churning liquid iron						Make volcanoes erupt			Two hundred and fifty million years ago				8250 years ago			By measuring rocks with a magnetometer						They collect them from the bottom of the ocean in a submarine	Not yet						Definitely			In the last week
2019-07-05 16:12:48 -0400	6 of 9	66.66				All of the above		Earth’s magnetic field in the past						The solid inner core		Hot churning liquid iron						Make volcanoes erupt				Two and a half billion years ago				781,000 years ago		By measuring rocks with a magnetometer						They collect them from the bottom of the ocean in a submarine	Not yet						Definitely			In the last week
2019-07-05 12:57:15 -0400	3 of 9	33.33				All of the above		Earth’s magnetic field in the past						The solid inner core				Rusty old lava		Tell us about the inside of our planet					Two hundred and fifty million years ago		Never						By reading maps of old explorers					They collect them from the bottom of the ocean in a submarine	Not yet							Maybe		In the last week
2019-07-05 12:34:38 -0400	8 of 9	88.88				All of the above		Earth’s magnetic field in the past						The solid inner core		Hot churning liquid iron						Make volcanoes erupt			Two hundred and fifty million years ago					781,000 years ago		By measuring rocks with a magnetometer			They drill them straight from the rock					Yes for less than 10 minutes		Agree			Definitely				In the last month
2019-07-05 12:31:09 -0400	6 of 9	66.66				All of the above		Earth’s magnetic field in the past			The liquid outer core					Hot churning liquid iron			Make compasses point north						Two hundred and fifty million years ago				8250 years ago					None of the above	They drill them straight from the rock						Yes for more than 10 minutes	Agree			Definitely				In the last month
2019-07-05 12:08:38 -0400	7 of 9	77.77				All of the above		Earth’s magnetic field in the past			The liquid outer core					Hot churning liquid iron						Make volcanoes erupt				Two and a half billion years ago				781,000 years ago		By measuring rocks with a magnetometer					They go down a deep mine shaft				Yes for more than 10 minutes	Agree				Maybe			In the last month
2019-07-05 12:04:46 -0400	3 of 9	33.33				All of the above		Earth’s magnetic field in the past						The solid inner core			One big magnet				Protect satellites in space					Two and a half billion years ago	Never					By measuring rocks with a magnetometer						They collect them from the bottom of the ocean in a submarine	Not yet							Maybe			In the last month
2019-07-05 11:48:28 -0400	7 of 9	77.77				All of the above		Earth’s magnetic field in the past			The liquid outer core					Hot churning liquid iron						Make volcanoes erupt			Two hundred and fifty million years ago			530 years ago				By measuring rocks with a magnetometer						They collect them from the bottom of the ocean in a submarine	Not yet							Maybe		In the last week
2019-07-05 11:43:14 -0400	2 of 9	22.22		A force field around electric wires				Earth’s magnetic field in the past					The hot rocky mantle		Lots of little magnets				Make compasses point north						Two hundred and fifty million years ago				8250 years ago					None of the above				They collect them from the bottom of the ocean in a submarine		Yes for less than 10 minutes		Agree			Definitely
2019-07-05 11:26:04 -0400	5 of 9	55.55				All of the above		Earth’s magnetic field in the past			The liquid outer core					Hot churning liquid iron			Make compasses point north							Two and a half billion years ago				781,000 years ago	By looking at fossils with a microscope						They go down a deep mine shaft		Not yet						Definitely			In the last week
2019-07-05 11:17:27 -0400	5 of 9	55.55			The thing that makes a compass point north			Earth’s magnetic field in the past						The solid inner core		Hot churning liquid iron				Tell us about the inside of our planet						Two and a half billion years ago				781,000 years ago		By measuring rocks with a magnetometer			They drill them straight from the rock				Not yet						Definitely			In the last week
2019-07-05 11:10:53 -0400	8 of 9	88.88				All of the above		Earth’s magnetic field in the past						The solid inner core		Hot churning liquid iron						Make volcanoes erupt			Two hundred and fifty million years ago					781,000 years ago		By measuring rocks with a magnetometer			They drill them straight from the rock						Yes for more than 10 minutes	Agree				Maybe		In the last week
2019-07-05 11:07:36 -0400	6 of 9	66.66				All of the above		Earth’s magnetic field in the past						The solid inner core		Hot churning liquid iron						Make volcanoes erupt			Two hundred and fifty million years ago		Never							None of the above	They drill them straight from the rock				Not yet							Maybe			In the last month
2019-07-05 10:58:44 -0400	8 of 9	88.88	The thing that makes fridge magnets stick					Earth’s magnetic field in the past			The liquid outer core					Hot churning liquid iron						Make volcanoes erupt			Two hundred and fifty million years ago					781,000 years ago		By measuring rocks with a magnetometer			They drill them straight from the rock						Yes for more than 10 minutes	Agree			Definitely				In the last month
2019-07-05 10:48:54 -0400	5 of 9	55.55		A force field around electric wires				Earth’s magnetic field in the past			The liquid outer core					Hot churning liquid iron						Make volcanoes erupt				Two and a half billion years ago		530 years ago					By reading maps of old explorers		They drill them straight from the rock				Not yet						Definitely			In the last week
2019-07-05 10:46:09 -0400	8 of 9	88.88				All of the above		Earth’s magnetic field in the past			The liquid outer core					Hot churning liquid iron						Make volcanoes erupt			Two hundred and fifty million years ago			530 years ago				By measuring rocks with a magnetometer			They drill them straight from the rock				Not yet						Definitely			In the last week
2019-07-05 10:34:37 -0400	7 of 9	77.77				All of the above		Earth’s magnetic field in the past						The solid inner core		Hot churning liquid iron						Make volcanoes erupt			Two hundred and fifty million years ago				8250 years ago			By measuring rocks with a magnetometer			They drill them straight from the rock				Not yet						Definitely
2019-07-05 10:24:08 -0400	9 of 9	100				All of the above		Earth’s magnetic field in the past			The liquid outer core					Hot churning liquid iron						Make volcanoes erupt			Two hundred and fifty million years ago					781,000 years ago		By measuring rocks with a magnetometer			They drill them straight from the rock						Yes for more than 10 minutes	Agree			Definitely			In the last week
2019-07-05 10:16:53 -0400	7 of 9	77.77				All of the above		Earth’s magnetic field in the past						The solid inner core		Hot churning liquid iron						Make volcanoes erupt			Two hundred and fifty million years ago							By measuring rocks with a magnetometer			They drill them straight from the rock				Not yet						Definitely
2019-07-05 10:06:20 -0400	7 of 9	77.77				All of the above		Earth’s magnetic field in the past			The liquid outer core					Hot churning liquid iron						Make volcanoes erupt		Two and a half million years ago					8250 years ago			By measuring rocks with a magnetometer			They drill them straight from the rock						Yes for more than 10 minutes	Agree			Definitely			In the last week
2019-07-05 09:56:51 -0400	7 of 9	77.77				All of the above		Earth’s magnetic field in the past			The liquid outer core					Hot churning liquid iron					Protect satellites in space				Two hundred and fifty million years ago				8250 years ago			By measuring rocks with a magnetometer			They drill them straight from the rock						Yes for more than 10 minutes	Agree			Definitely			In the last week
2019-07-05 09:42:31 -0400	6 of 9	66.66				All of the above				Antique compasses	The liquid outer core				Lots of little magnets							Make volcanoes erupt			Two hundred and fifty million years ago				8250 years ago			By measuring rocks with a magnetometer			They drill them straight from the rock				Not yet						Definitely			In the last week
2019-07-05 09:38:58 -0400	9 of 9	100				All of the above		Earth’s magnetic field in the past			The liquid outer core					Hot churning liquid iron						Make volcanoes erupt			Two hundred and fifty million years ago					781,000 years ago		By measuring rocks with a magnetometer			They drill them straight from the rock						Yes for more than 10 minutes	Agree			Definitely				In the last month
2019-07-05 09:28:55 -0400	6 of 9	66.66				All of the above		Earth’s magnetic field in the past			The liquid outer core					Hot churning liquid iron						Make volcanoes erupt				Two and a half billion years ago			8250 years ago			By measuring rocks with a magnetometer						They collect them from the bottom of the ocean in a submarine			Yes for more than 10 minutes	Agree			Definitely			In the last week
2019-07-05 09:24:48 -0400	8 of 9	88.88		A force field around electric wires				Earth’s magnetic field in the past			The liquid outer core					Hot churning liquid iron						Make volcanoes erupt			Two hundred and fifty million years ago					781,000 years ago		By measuring rocks with a magnetometer			They drill them straight from the rock						Yes for more than 10 minutes	Agree				Maybe		In the last week
2019-07-05 09:10:53 -0400	3 of 9	33.33			The thing that makes a compass point north			Earth’s magnetic field in the past						The solid inner core		Hot churning liquid iron				Tell us about the inside of our planet						Two and a half billion years ago			8250 years ago			By measuring rocks with a magnetometer					They go down a deep mine shaft		Not yet						Definitely			In the last week
2019-07-05 09:06:12 -0400	5 of 9	55.55			The thing that makes a compass point north		Dinosaurs and fossils				The liquid outer core					Hot churning liquid iron				Tell us about the inside of our planet					Two hundred and fifty million years ago					781,000 years ago		By measuring rocks with a magnetometer					They go down a deep mine shaft				Yes for more than 10 minutes	Agree			Definitely
2019-07-05 08:59:00 -0400	3 of 9	33.33			The thing that makes a compass point north			Earth’s magnetic field in the past						The solid inner core		Hot churning liquid iron					Protect satellites in space					Two and a half billion years ago			8250 years ago			By measuring rocks with a magnetometer						They collect them from the bottom of the ocean in a submarine			Yes for more than 10 minutes	Agree				Maybe
2019-07-05 08:53:10 -0400	8 of 9	88.88				All of the above		Earth’s magnetic field in the past					The hot rocky mantle			Hot churning liquid iron						Make volcanoes erupt			Two hundred and fifty million years ago					781,000 years ago		By measuring rocks with a magnetometer			They drill them straight from the rock						Yes for more than 10 minutes	Agree			Definitely			In the last week
2019-07-05 08:38:12 -0400	6 of 9	66.66			The thing that makes a compass point north			Earth’s magnetic field in the past						The solid inner core		Hot churning liquid iron						Make volcanoes erupt			Two hundred and fifty million years ago				8250 years ago			By measuring rocks with a magnetometer			They drill them straight from the rock						Yes for more than 10 minutes	Agree				Maybe		In the last week
2019-07-05 08:29:10 -0400	7 of 9	77.77		A force field around electric wires				Earth’s magnetic field in the past			The liquid outer core					Hot churning liquid iron						Make volcanoes erupt				Two and a half billion years ago				781,000 years ago		By measuring rocks with a magnetometer			They drill them straight from the rock				Not yet						Definitely			In the last week
2019-07-05 08:25:33 -0400	4 of 9	44.44			The thing that makes a compass point north			Earth’s magnetic field in the past					The hot rocky mantle				One big magnet				Protect satellites in space				Two hundred and fifty million years ago					781,000 years ago			By reading maps of old explorers		They drill them straight from the rock				Not yet							Maybe		In the last week
2019-07-05 08:20:30 -0400	7 of 9	77.77				All of the above		Earth’s magnetic field in the past			The liquid outer core					Hot churning liquid iron						Make volcanoes erupt				Two and a half billion years ago				781,000 years ago		By measuring rocks with a magnetometer						They collect them from the bottom of the ocean in a submarine	Not yet						Definitely			In the last week
2019-07-05 08:17:17 -0400	5 of 9	55.55				All of the above		Earth’s magnetic field in the past						The solid inner core		Hot churning liquid iron						Make volcanoes erupt			Two hundred and fifty million years ago		Never							None of the above			They go down a deep mine shaft		Not yet						Definitely
2019-07-05 08:12:54 -0400	7 of 9	77.77				All of the above		Earth’s magnetic field in the past					The hot rocky mantle			Hot churning liquid iron						Make volcanoes erupt			Two hundred and fifty million years ago					781,000 years ago		By measuring rocks with a magnetometer					They go down a deep mine shaft		Not yet						Definitely			In the last week
2019-07-05 08:09:11 -0400	8 of 9	88.88				All of the above		Earth’s magnetic field in the past			The liquid outer core					Hot churning liquid iron						Make volcanoes erupt			Two hundred and fifty million years ago					781,000 years ago		By measuring rocks with a magnetometer					They go down a deep mine shaft		Not yet						Definitely
2019-07-05 08:04:09 -0400	6 of 9	66.66				All of the above		Earth’s magnetic field in the past						The solid inner core				Rusty old lava			Protect satellites in space				Two hundred and fifty million years ago					781,000 years ago		By measuring rocks with a magnetometer			They drill them straight from the rock				Not yet						Definitely				In the last month
2019-07-05 07:58:27 -0400	4 of 9	44.44		A force field around electric wires				Earth’s magnetic field in the past						The solid inner core		Hot churning liquid iron						Make volcanoes erupt				Two and a half billion years ago	Never						By reading maps of old explorers		They drill them straight from the rock				Not yet						Definitely
2019-07-05 07:54:01 -0400	6 of 9	66.66		A force field around electric wires			Dinosaurs and fossils				The liquid outer core					Hot churning liquid iron						Make volcanoes erupt			Two hundred and fifty million years ago					781,000 years ago		By measuring rocks with a magnetometer					They go down a deep mine shaft			Yes for less than 10 minutes		Agree			Definitely				In the last month
2019-07-05 07:48:11 -0400	6 of 9	66.66				All of the above		Earth’s magnetic field in the past						The solid inner core			One big magnet					Make volcanoes erupt			Two hundred and fifty million years ago					781,000 years ago		By measuring rocks with a magnetometer					They go down a deep mine shaft		Not yet						Definitely				In the last month
2019-07-05 07:43:58 -0400	1 of 9	11.11		A force field around electric wires				Earth’s magnetic field in the past						The solid inner core	Lots of little magnets						Protect satellites in space					Two and a half billion years ago	Never				By looking at fossils with a microscope							They collect them from the bottom of the ocean in a submarine			Yes for more than 10 minutes	Agree			Definitely
2019-07-05 07:35:14 -0400	4 of 9	44.44			The thing that makes a compass point north		Dinosaurs and fossils							The solid inner core		Hot churning liquid iron					Protect satellites in space					Two and a half billion years ago				781,000 years ago		By measuring rocks with a magnetometer			They drill them straight from the rock				Not yet						Definitely			In the last week
2019-07-05 07:32:15 -0400	9 of 9	100				All of the above		Earth’s magnetic field in the past			The liquid outer core					Hot churning liquid iron						Make volcanoes erupt			Two hundred and fifty million years ago					781,000 years ago		By measuring rocks with a magnetometer			They drill them straight from the rock					Yes for less than 10 minutes		Agree			Definitely			In the last week
2019-07-05 07:28:44 -0400	6 of 9	66.66				All of the above		Earth’s magnetic field in the past						The solid inner core		Hot churning liquid iron						Make volcanoes erupt			Two hundred and fifty million years ago				8250 years ago			By measuring rocks with a magnetometer						They collect them from the bottom of the ocean in a submarine		Yes for less than 10 minutes				Disagree	Definitely			In the last week
2019-07-05 07:25:21 -0400	6 of 9	66.66				All of the above		Earth’s magnetic field in the past						The solid inner core		Hot churning liquid iron						Make volcanoes erupt				Two and a half billion years ago				781,000 years ago		By measuring rocks with a magnetometer						They collect them from the bottom of the ocean in a submarine	Not yet						Definitely
2019-07-05 07:19:32 -0400	5 of 9	55.55				All of the above		Earth’s magnetic field in the past						The solid inner core		Hot churning liquid iron						Make volcanoes erupt				Two and a half billion years ago				781,000 years ago	By looking at fossils with a microscope							They collect them from the bottom of the ocean in a submarine	Not yet						Definitely			In the last week
2019-07-05 07:16:02 -0400	6 of 9	66.66				All of the above		Earth’s magnetic field in the past						The solid inner core		Hot churning liquid iron						Make volcanoes erupt			Two hundred and fifty million years ago		Never							None of the above	They drill them straight from the rock				Not yet						Definitely			In the last week
2019-07-05 07:13:09 -0400	4 of 9	44.44				All of the above	Dinosaurs and fossils							The solid inner core			One big magnet					Make volcanoes erupt				Two and a half billion years ago			8250 years ago			By measuring rocks with a magnetometer			They drill them straight from the rock				Not yet						Definitely				In the last month
2019-07-05 07:10:24 -0400	6 of 9	66.66			The thing that makes a compass point north			Earth’s magnetic field in the past						The solid inner core		Hot churning liquid iron						Make volcanoes erupt		Two and a half million years ago						781,000 years ago		By measuring rocks with a magnetometer			They drill them straight from the rock						Yes for more than 10 minutes	Agree				Maybe		In the last week
2019-07-05 07:05:35 -0400	3 of 9	33.33			The thing that makes a compass point north			Earth’s magnetic field in the past						The solid inner core		Hot churning liquid iron				Tell us about the inside of our planet						Two and a half billion years ago	Never					By measuring rocks with a magnetometer						They collect them from the bottom of the ocean in a submarine	Not yet						Definitely
2019-07-05 07:02:16 -0400	5 of 9	55.55				All of the above		Earth’s magnetic field in the past						The solid inner core			One big magnet					Make volcanoes erupt				Two and a half billion years ago			8250 years ago			By measuring rocks with a magnetometer			They drill them straight from the rock				Not yet							Maybe			In the last month
2019-07-05 06:58:37 -0400	8 of 9	88.88				All of the above		Earth’s magnetic field in the past			The liquid outer core					Hot churning liquid iron						Make volcanoes erupt			Two hundred and fifty million years ago					781,000 years ago		By measuring rocks with a magnetometer					They go down a deep mine shaft		Not yet						Definitely				In the last month
2019-07-05 06:43:48 -0400	5 of 9	55.55		A force field around electric wires				Earth’s magnetic field in the past						The solid inner core		Hot churning liquid iron						Make volcanoes erupt			Two hundred and fifty million years ago				8250 years ago			By measuring rocks with a magnetometer					They go down a deep mine shaft		Not yet						Definitely			In the last week
2019-07-05 06:33:48 -0400	5 of 9	55.55				All of the above		Earth’s magnetic field in the past						The solid inner core		Hot churning liquid iron						Make volcanoes erupt				Two and a half billion years ago	Never							None of the above	They drill them straight from the rock						Yes for more than 10 minutes	Agree			Definitely				In the last month
2019-07-05 06:23:32 -0400	8 of 9	88.88				All of the above		Earth’s magnetic field in the past			The liquid outer core					Hot churning liquid iron						Make volcanoes erupt				Two and a half billion years ago				781,000 years ago		By measuring rocks with a magnetometer			They drill them straight from the rock						Yes for more than 10 minutes	Agree			Definitely			In the last week
2019-07-05 06:16:19 -0400	6 of 9	66.66				All of the above		Earth’s magnetic field in the past						The solid inner core		Hot churning liquid iron					Protect satellites in space				Two hundred and fifty million years ago					781,000 years ago		By measuring rocks with a magnetometer						They collect them from the bottom of the ocean in a submarine		Yes for less than 10 minutes			Neither agree nor disagree			Maybe			In the last month
2019-07-05 06:02:51 -0400	7 of 9	77.77				All of the above		Earth’s magnetic field in the past			The liquid outer core					Hot churning liquid iron						Make volcanoes erupt				Two and a half billion years ago				781,000 years ago		By measuring rocks with a magnetometer						They collect them from the bottom of the ocean in a submarine		Yes for less than 10 minutes		Agree				Maybe		In the last week
2019-07-05 05:58:34 -0400	5 of 9	55.55				All of the above	Dinosaurs and fossils				The liquid outer core					Hot churning liquid iron						Make volcanoes erupt				Two and a half billion years ago	Never						By reading maps of old explorers		They drill them straight from the rock				Not yet						Definitely			In the last week
2019-07-05 05:56:12 -0400	4 of 9	44.44				All of the above		Earth’s magnetic field in the past						The solid inner core		Hot churning liquid iron					Protect satellites in space					Two and a half billion years ago			8250 years ago			By measuring rocks with a magnetometer						They collect them from the bottom of the ocean in a submarine	Not yet						Definitely
2019-07-05 05:52:24 -0400	6 of 9	66.66				All of the above		Earth’s magnetic field in the past						The solid inner core	Lots of little magnets						Protect satellites in space				Two hundred and fifty million years ago					781,000 years ago		By measuring rocks with a magnetometer			They drill them straight from the rock						Yes for more than 10 minutes	Agree			Definitely
2019-07-05 05:46:49 -0400	5 of 9	55.55				All of the above		Earth’s magnetic field in the past						The solid inner core		Hot churning liquid iron						Make volcanoes erupt				Two and a half billion years ago	Never							None of the above	They drill them straight from the rock				Not yet							Maybe
2019-07-05 05:38:19 -0400	3 of 9	33.33				All of the above	Dinosaurs and fossils							The solid inner core		Hot churning liquid iron				Tell us about the inside of our planet						Two and a half billion years ago	Never						By reading maps of old explorers		They drill them straight from the rock				Not yet						Definitely			In the last week
2019-07-05 05:33:56 -0400	5 of 9	55.55				All of the above		Earth’s magnetic field in the past						The solid inner core		Hot churning liquid iron						Make volcanoes erupt				Two and a half billion years ago		530 years ago			By looking at fossils with a microscope				They drill them straight from the rock					Yes for less than 10 minutes		Agree			Definitely			In the last week
2019-07-05 05:30:01 -0400	8 of 9	88.88				All of the above			The magnetic sense of birds		The liquid outer core					Hot churning liquid iron						Make volcanoes erupt			Two hundred and fifty million years ago					781,000 years ago		By measuring rocks with a magnetometer			They drill them straight from the rock					Yes for less than 10 minutes		Agree				Maybe			In the last month
2019-07-05 05:18:38 -0400	5 of 9	55.55				All of the above		Earth’s magnetic field in the past						The solid inner core		Hot churning liquid iron						Make volcanoes erupt				Two and a half billion years ago	Never					By measuring rocks with a magnetometer						They collect them from the bottom of the ocean in a submarine	Not yet						Definitely				In the last month
2019-07-04 11:34:27 -0400	8 of 9	88.88				All of the above		Earth’s magnetic field in the past			The liquid outer core					Hot churning liquid iron						Make volcanoes erupt				Two and a half billion years ago				781,000 years ago		By measuring rocks with a magnetometer			They drill them straight from the rock					Yes for less than 10 minutes		Agree				Maybe		In the last week
2019-07-04 11:29:42 -0400	7 of 9	77.77				All of the above		Earth’s magnetic field in the past			The liquid outer core					Hot churning liquid iron						Make volcanoes erupt				Two and a half billion years ago				781,000 years ago		By measuring rocks with a magnetometer						They collect them from the bottom of the ocean in a submarine		Yes for less than 10 minutes		Agree			Definitely			In the last week
2019-07-04 11:25:32 -0400	8 of 9	88.88				All of the above		Earth’s magnetic field in the past			The liquid outer core					Hot churning liquid iron						Make volcanoes erupt		Two and a half million years ago						781,000 years ago		By measuring rocks with a magnetometer			They drill them straight from the rock						Yes for more than 10 minutes	Agree			Definitely
2019-07-04 11:18:45 -0400	7 of 9	77.77				All of the above		Earth’s magnetic field in the past			The liquid outer core					Hot churning liquid iron						Make volcanoes erupt			Two hundred and fifty million years ago					781,000 years ago				None of the above				They collect them from the bottom of the ocean in a submarine	Not yet						Definitely				In the last month
2019-07-04 11:14:58 -0400	3 of 9	33.33		A force field around electric wires				Earth’s magnetic field in the past						The solid inner core	Lots of little magnets						Protect satellites in space					Two and a half billion years ago	Never					By measuring rocks with a magnetometer			They drill them straight from the rock				Not yet						Definitely
2019-07-04 11:08:11 -0400	5 of 9	55.55				All of the above		Earth’s magnetic field in the past						The solid inner core		Hot churning liquid iron						Make volcanoes erupt			Two hundred and fifty million years ago		Never				By looking at fossils with a microscope							They collect them from the bottom of the ocean in a submarine	Not yet						Definitely
2019-07-04 11:02:50 -0400	8 of 9	88.88				All of the above		Earth’s magnetic field in the past			The liquid outer core					Hot churning liquid iron						Make volcanoes erupt				Two and a half billion years ago				781,000 years ago		By measuring rocks with a magnetometer			They drill them straight from the rock						Yes for more than 10 minutes	Agree				Maybe		In the last week
2019-07-04 10:59:02 -0400	7 of 9	77.77				All of the above		Earth’s magnetic field in the past						The solid inner core		Hot churning liquid iron						Make volcanoes erupt				Two and a half billion years ago				781,000 years ago		By measuring rocks with a magnetometer			They drill them straight from the rock						Yes for more than 10 minutes	Agree			Definitely
2019-07-04 10:35:56 -0400	8 of 9	88.88			The thing that makes a compass point north			Earth’s magnetic field in the past			The liquid outer core					Hot churning liquid iron						Make volcanoes erupt			Two hundred and fifty million years ago					781,000 years ago		By measuring rocks with a magnetometer			They drill them straight from the rock						Yes for more than 10 minutes	Agree			Definitely
2019-07-04 10:01:59 -0400	5 of 9	55.55				All of the above		Earth’s magnetic field in the past						The solid inner core		Hot churning liquid iron						Make volcanoes erupt				Two and a half billion years ago	Never					By measuring rocks with a magnetometer						They collect them from the bottom of the ocean in a submarine	Not yet						Definitely			In the last week
2019-07-04 09:53:16 -0400	3 of 9	33.33		A force field around electric wires				Earth’s magnetic field in the past						The solid inner core		Hot churning liquid iron					Protect satellites in space				Two hundred and fifty million years ago		Never							None of the above				They collect them from the bottom of the ocean in a submarine	Not yet							Maybe
2019-07-04 09:40:16 -0400	6 of 9	66.66			The thing that makes a compass point north			Earth’s magnetic field in the past						The solid inner core		Hot churning liquid iron					Protect satellites in space				Two hundred and fifty million years ago					781,000 years ago		By measuring rocks with a magnetometer			They drill them straight from the rock						Yes for more than 10 minutes	Agree			Definitely			In the last week
2019-07-04 09:31:12 -0400	6 of 9	66.66			The thing that makes a compass point north			Earth’s magnetic field in the past						The solid inner core		Hot churning liquid iron						Make volcanoes erupt				Two and a half billion years ago				781,000 years ago		By measuring rocks with a magnetometer			They drill them straight from the rock						Yes for more than 10 minutes	Agree			Definitely
2019-07-04 09:23:22 -0400	4 of 9	44.44		A force field around electric wires				Earth’s magnetic field in the past						The solid inner core		Hot churning liquid iron						Make volcanoes erupt				Two and a half billion years ago		530 years ago				By measuring rocks with a magnetometer				They find them in a museum collection			Not yet						Definitely			In the last week
2019-07-04 09:10:01 -0400	4 of 9	44.44				All of the above		Earth’s magnetic field in the past						The solid inner core		Hot churning liquid iron					Protect satellites in space					Two and a half billion years ago			8250 years ago			By measuring rocks with a magnetometer						They collect them from the bottom of the ocean in a submarine	Not yet						Definitely			In the last week
2019-07-04 09:04:42 -0400	7 of 9	77.77				All of the above		Earth’s magnetic field in the past			The liquid outer core					Hot churning liquid iron						Make volcanoes erupt				Two and a half billion years ago				781,000 years ago		By measuring rocks with a magnetometer						They collect them from the bottom of the ocean in a submarine	Not yet						Definitely			In the last week
2019-07-04 08:51:54 -0400	5 of 9	55.55				All of the above		Earth’s magnetic field in the past			The liquid outer core					Hot churning liquid iron						Make volcanoes erupt				Two and a half billion years ago			8250 years ago				By reading maps of old explorers			They find them in a museum collection			Not yet						Definitely				In the last month
2019-07-04 08:36:26 -0400	8 of 9	88.88				All of the above		Earth’s magnetic field in the past						The solid inner core		Hot churning liquid iron						Make volcanoes erupt			Two hundred and fifty million years ago					781,000 years ago		By measuring rocks with a magnetometer			They drill them straight from the rock					Yes for less than 10 minutes		Agree			Definitely			In the last week
2019-07-04 08:32:42 -0400	8 of 9	88.88				All of the above		Earth’s magnetic field in the past			The liquid outer core					Hot churning liquid iron					Protect satellites in space				Two hundred and fifty million years ago					781,000 years ago		By measuring rocks with a magnetometer			They drill them straight from the rock						Yes for more than 10 minutes	Agree			Definitely			In the last week
2019-07-04 08:13:08 -0400	7 of 9	77.77				All of the above		Earth’s magnetic field in the past						The solid inner core		Hot churning liquid iron						Make volcanoes erupt			Two hundred and fifty million years ago		Never					By measuring rocks with a magnetometer			They drill them straight from the rock					Yes for less than 10 minutes		Agree				Maybe		In the last week
2019-07-04 07:53:20 -0400	6 of 9	66.66				All of the above		Earth’s magnetic field in the past						The solid inner core		Hot churning liquid iron						Make volcanoes erupt				Two and a half billion years ago	Never					By measuring rocks with a magnetometer			They drill them straight from the rock				Not yet						Definitely				In the last month
2019-07-04 07:49:17 -0400	9 of 9	100				All of the above		Earth’s magnetic field in the past			The liquid outer core					Hot churning liquid iron						Make volcanoes erupt			Two hundred and fifty million years ago					781,000 years ago		By measuring rocks with a magnetometer			They drill them straight from the rock					Yes for less than 10 minutes		Agree				Maybe			In the last month
2019-07-04 07:38:35 -0400	7 of 9	77.77				All of the above		Earth’s magnetic field in the past						The solid inner core		Hot churning liquid iron						Make volcanoes erupt			Two hundred and fifty million years ago					781,000 years ago				None of the above	They drill them straight from the rock				Not yet						Definitely			In the last week
2019-07-04 07:25:40 -0400	3 of 9	33.33			The thing that makes a compass point north			Earth’s magnetic field in the past						The solid inner core		Hot churning liquid iron					Protect satellites in space				Two hundred and fifty million years ago			530 years ago					By reading maps of old explorers				They go down a deep mine shaft			Yes for less than 10 minutes		Agree				Maybe
2019-07-04 07:13:44 -0400	5 of 9	55.55				All of the above		Earth’s magnetic field in the past						The solid inner core		Hot churning liquid iron						Make volcanoes erupt				Two and a half billion years ago			8250 years ago			By measuring rocks with a magnetometer						They collect them from the bottom of the ocean in a submarine	Not yet						Definitely			In the last week
2019-07-04 07:02:14 -0400	7 of 9	77.77		A force field around electric wires				Earth’s magnetic field in the past			The liquid outer core					Hot churning liquid iron						Make volcanoes erupt				Two and a half billion years ago				781,000 years ago		By measuring rocks with a magnetometer			They drill them straight from the rock				Not yet						Definitely			In the last week
2019-07-04 06:49:09 -0400	7 of 9	77.77				All of the above		Earth’s magnetic field in the past						The solid inner core		Hot churning liquid iron						Make volcanoes erupt				Two and a half billion years ago				781,000 years ago		By measuring rocks with a magnetometer			They drill them straight from the rock					Yes for less than 10 minutes		Agree			Definitely				In the last month
2019-07-04 06:41:32 -0400	7 of 9	77.77				All of the above		Earth’s magnetic field in the past			The liquid outer core					Hot churning liquid iron					Protect satellites in space			Two and a half million years ago						781,000 years ago		By measuring rocks with a magnetometer			They drill them straight from the rock					Yes for less than 10 minutes		Agree			Definitely			In the last week
2019-07-04 06:13:59 -0400	7 of 9	77.77				All of the above		Earth’s magnetic field in the past						The solid inner core		Hot churning liquid iron						Make volcanoes erupt			Two hundred and fifty million years ago				8250 years ago			By measuring rocks with a magnetometer			They drill them straight from the rock					Yes for less than 10 minutes		Agree				Maybe
2019-07-04 06:01:26 -0400	7 of 9	77.77				All of the above		Earth’s magnetic field in the past						The solid inner core		Hot churning liquid iron						Make volcanoes erupt			Two hundred and fifty million years ago					781,000 years ago		By measuring rocks with a magnetometer					They go down a deep mine shaft				Yes for more than 10 minutes	Agree			Definitely			In the last week
2019-07-04 05:51:40 -0400	5 of 9	55.55				All of the above		Earth’s magnetic field in the past						The solid inner core		Hot churning liquid iron						Make volcanoes erupt				Two and a half billion years ago	Never					By measuring rocks with a magnetometer						They collect them from the bottom of the ocean in a submarine		Yes for less than 10 minutes		Agree			Definitely				In the last month
2019-07-04 05:40:29 -0400	7 of 9	77.77			The thing that makes a compass point north			Earth’s magnetic field in the past			The liquid outer core					Hot churning liquid iron						Make volcanoes erupt			Two hundred and fifty million years ago					781,000 years ago		By measuring rocks with a magnetometer						They collect them from the bottom of the ocean in a submarine			Yes for more than 10 minutes	Agree			Definitely			In the last week
2019-07-04 05:28:57 -0400	6 of 9	66.66				All of the above		Earth’s magnetic field in the past			The liquid outer core					Hot churning liquid iron						Make volcanoes erupt				Two and a half billion years ago		530 years ago				By measuring rocks with a magnetometer						They collect them from the bottom of the ocean in a submarine			Yes for more than 10 minutes	Agree			Definitely			In the last week
2019-07-03 11:08:42 -0400	8 of 9	88.88				All of the above		Earth’s magnetic field in the past			The liquid outer core					Hot churning liquid iron						Make volcanoes erupt			Two hundred and fifty million years ago					781,000 years ago		By measuring rocks with a magnetometer						They collect them from the bottom of the ocean in a submarine	Not yet						Definitely
2019-07-03 10:58:40 -0400	6 of 9	66.66				All of the above		Earth’s magnetic field in the past						The solid inner core		Hot churning liquid iron				Tell us about the inside of our planet						Two and a half billion years ago				781,000 years ago		By measuring rocks with a magnetometer			They drill them straight from the rock				Not yet						Definitely			In the last week
2019-07-03 10:49:20 -0400	3 of 9	33.33				All of the above		Earth’s magnetic field in the past						The solid inner core		Hot churning liquid iron				Tell us about the inside of our planet						Two and a half billion years ago			8250 years ago		By looking at fossils with a microscope							They collect them from the bottom of the ocean in a submarine	Not yet						Definitely			In the last week
2019-07-03 10:31:03 -0400	9 of 9	100				All of the above		Earth’s magnetic field in the past			The liquid outer core					Hot churning liquid iron						Make volcanoes erupt			Two hundred and fifty million years ago					781,000 years ago		By measuring rocks with a magnetometer			They drill them straight from the rock						Yes for more than 10 minutes	Agree				Maybe		In the last week
2019-07-03 10:10:14 -0400	4 of 9	44.44				All of the above		Earth’s magnetic field in the past				The ocean floor			Lots of little magnets					Tell us about the inside of our planet						Two and a half billion years ago		530 years ago				By measuring rocks with a magnetometer			They drill them straight from the rock				Not yet							Maybe
2019-07-03 09:53:09 -0400	6 of 9	66.66				All of the above		Earth’s magnetic field in the past						The solid inner core			One big magnet					Make volcanoes erupt			Two hundred and fifty million years ago			530 years ago				By measuring rocks with a magnetometer			They drill them straight from the rock				Not yet						Definitely			In the last week
2019-07-03 09:37:24 -0400	6 of 9	66.66				All of the above		Earth’s magnetic field in the past			The liquid outer core					Hot churning liquid iron					Protect satellites in space					Two and a half billion years ago			8250 years ago			By measuring rocks with a magnetometer			They drill them straight from the rock						Yes for more than 10 minutes	Agree				Maybe		In the last week
2019-07-03 09:28:01 -0400	5 of 9	55.55				All of the above		Earth’s magnetic field in the past					The hot rocky mantle			Hot churning liquid iron						Make volcanoes erupt				Two and a half billion years ago				781,000 years ago				None of the above				They collect them from the bottom of the ocean in a submarine		Yes for less than 10 minutes		Agree				Maybe			In the last month
2019-07-03 09:19:06 -0400	4 of 9	44.44				All of the above		Earth’s magnetic field in the past					The hot rocky mantle				One big magnet					Make volcanoes erupt			Two hundred and fifty million years ago		Never				By looking at fossils with a microscope							They collect them from the bottom of the ocean in a submarine	Not yet						Definitely
2019-07-03 09:06:56 -0400	6 of 9	66.66				All of the above		Earth’s magnetic field in the past						The solid inner core		Hot churning liquid iron						Make volcanoes erupt				Two and a half billion years ago			8250 years ago			By measuring rocks with a magnetometer			They drill them straight from the rock				Not yet						Definitely			In the last week
2019-07-03 08:59:58 -0400	6 of 9	66.66				All of the above		Earth’s magnetic field in the past						The solid inner core		Hot churning liquid iron						Make volcanoes erupt				Two and a half billion years ago				781,000 years ago		By measuring rocks with a magnetometer						They collect them from the bottom of the ocean in a submarine	Not yet						Definitely				In the last month
2019-07-03 08:41:24 -0400	7 of 9	77.77				All of the above		Earth’s magnetic field in the past			The liquid outer core					Hot churning liquid iron						Make volcanoes erupt			Two hundred and fifty million years ago				8250 years ago			By measuring rocks with a magnetometer					They go down a deep mine shaft		Not yet							Maybe
2019-07-03 08:33:09 -0400	7 of 9	77.77				All of the above		Earth’s magnetic field in the past						The solid inner core		Hot churning liquid iron						Make volcanoes erupt			Two hundred and fifty million years ago			530 years ago				By measuring rocks with a magnetometer			They drill them straight from the rock						Yes for more than 10 minutes		Neither agree nor disagree			Maybe		In the last week
2019-07-03 08:22:31 -0400	6 of 9	66.66				All of the above		Earth’s magnetic field in the past			The liquid outer core					Hot churning liquid iron						Make volcanoes erupt				Two and a half billion years ago			8250 years ago			By measuring rocks with a magnetometer					They go down a deep mine shaft		Not yet							Maybe		In the last week
2019-07-03 08:16:50 -0400	6 of 9	66.66				All of the above		Earth’s magnetic field in the past						The solid inner core		Hot churning liquid iron						Make volcanoes erupt				Two and a half billion years ago				781,000 years ago		By measuring rocks with a magnetometer					They go down a deep mine shaft			Yes for less than 10 minutes		Agree			Definitely				In the last month
2019-07-03 08:07:24 -0400	5 of 9	55.55				All of the above			The magnetic sense of birds					The solid inner core		Hot churning liquid iron						Make volcanoes erupt				Two and a half billion years ago			8250 years ago			By measuring rocks with a magnetometer			They drill them straight from the rock				Not yet						Definitely			In the last week
2019-07-03 07:56:27 -0400	4 of 9	44.44				All of the above		Earth’s magnetic field in the past						The solid inner core		Hot churning liquid iron					Protect satellites in space					Two and a half billion years ago	Never					By measuring rocks with a magnetometer					They go down a deep mine shaft		Not yet						Definitely				In the last month
2019-07-03 07:45:08 -0400	5 of 9	55.55		A force field around electric wires				Earth’s magnetic field in the past						The solid inner core		Hot churning liquid iron					Protect satellites in space				Two hundred and fifty million years ago				8250 years ago			By measuring rocks with a magnetometer			They drill them straight from the rock				Not yet						Definitely			In the last week
2019-07-03 07:39:49 -0400	6 of 9	66.66				All of the above		Earth’s magnetic field in the past						The solid inner core		Hot churning liquid iron					Protect satellites in space				Two hundred and fifty million years ago					781,000 years ago		By measuring rocks with a magnetometer						They collect them from the bottom of the ocean in a submarine	Not yet						Definitely			In the last week
2019-07-03 07:34:11 -0400	5 of 9	55.55				All of the above		Earth’s magnetic field in the past					The hot rocky mantle			Hot churning liquid iron						Make volcanoes erupt				Two and a half billion years ago			8250 years ago			By measuring rocks with a magnetometer						They collect them from the bottom of the ocean in a submarine	Not yet							Maybe		In the last week
2019-07-03 07:28:43 -0400	7 of 9	77.77				All of the above		Earth’s magnetic field in the past						The solid inner core		Hot churning liquid iron						Make volcanoes erupt			Two hundred and fifty million years ago			530 years ago				By measuring rocks with a magnetometer			They drill them straight from the rock				Not yet						Definitely				In the last month
2019-07-03 07:22:25 -0400	5 of 9	55.55				All of the above		Earth’s magnetic field in the past						The solid inner core		Hot churning liquid iron						Make volcanoes erupt				Two and a half billion years ago				781,000 years ago	By looking at fossils with a microscope						They go down a deep mine shaft		Not yet							Maybe		In the last week
2019-07-03 07:16:35 -0400	7 of 9	77.77				All of the above		Earth’s magnetic field in the past			The liquid outer core					Hot churning liquid iron						Make volcanoes erupt				Two and a half billion years ago				781,000 years ago		By measuring rocks with a magnetometer						They collect them from the bottom of the ocean in a submarine			Yes for more than 10 minutes	Agree			Definitely			In the last week
2019-07-03 07:11:45 -0400	8 of 9	88.88				All of the above		Earth’s magnetic field in the past						The solid inner core		Hot churning liquid iron						Make volcanoes erupt			Two hundred and fifty million years ago					781,000 years ago		By measuring rocks with a magnetometer			They drill them straight from the rock				Not yet						Definitely
2019-07-03 07:07:16 -0400	6 of 9	66.66				All of the above		Earth’s magnetic field in the past			The liquid outer core					Hot churning liquid iron						Make volcanoes erupt			Two hundred and fifty million years ago				8250 years ago					None of the above				They collect them from the bottom of the ocean in a submarine	Not yet								Definitely not	In the last week
2019-07-03 07:01:34 -0400	9 of 9	100				All of the above		Earth’s magnetic field in the past			The liquid outer core					Hot churning liquid iron						Make volcanoes erupt			Two hundred and fifty million years ago					781,000 years ago		By measuring rocks with a magnetometer			They drill them straight from the rock						Yes for more than 10 minutes	Agree			Definitely				In the last month
2019-07-03 06:56:20 -0400	8 of 9	88.88				All of the above		Earth’s magnetic field in the past			The liquid outer core					Hot churning liquid iron						Make volcanoes erupt				Two and a half billion years ago				781,000 years ago		By measuring rocks with a magnetometer			They drill them straight from the rock					Yes for less than 10 minutes		Agree				Maybe		In the last week
2019-07-03 06:50:32 -0400	4 of 9	44.44				All of the above		Earth’s magnetic field in the past						The solid inner core	Lots of little magnets						Protect satellites in space				Two hundred and fifty million years ago		Never							None of the above	They drill them straight from the rock				Not yet						Definitely
2019-07-03 06:45:33 -0400	6 of 9	66.66				All of the above		Earth’s magnetic field in the past			The liquid outer core					Hot churning liquid iron						Make volcanoes erupt		Two and a half million years ago				530 years ago				By measuring rocks with a magnetometer						They collect them from the bottom of the ocean in a submarine	Not yet						Definitely			In the last week
2019-07-03 06:37:15 -0400	5 of 9	55.55				All of the above		Earth’s magnetic field in the past						The solid inner core		Hot churning liquid iron					Protect satellites in space					Two and a half billion years ago	Never					By measuring rocks with a magnetometer			They drill them straight from the rock				Not yet						Definitely
2019-07-03 06:33:15 -0400	7 of 9	77.77				All of the above		Earth’s magnetic field in the past						The solid inner core		Hot churning liquid iron						Make volcanoes erupt				Two and a half billion years ago				781,000 years ago		By measuring rocks with a magnetometer			They drill them straight from the rock					Yes for less than 10 minutes		Agree			Definitely			In the last week
2019-07-03 06:27:46 -0400	8 of 9	88.88		A force field around electric wires				Earth’s magnetic field in the past			The liquid outer core					Hot churning liquid iron						Make volcanoes erupt			Two hundred and fifty million years ago					781,000 years ago		By measuring rocks with a magnetometer			They drill them straight from the rock				Not yet						Definitely			In the last week
2019-07-03 06:24:31 -0400	8 of 9	88.88				All of the above		Earth’s magnetic field in the past						The solid inner core		Hot churning liquid iron						Make volcanoes erupt			Two hundred and fifty million years ago					781,000 years ago		By measuring rocks with a magnetometer			They drill them straight from the rock				Not yet										In the last month
2019-07-03 06:19:29 -0400	7 of 9	77.77				All of the above		Earth’s magnetic field in the past			The liquid outer core					Hot churning liquid iron					Protect satellites in space					Two and a half billion years ago				781,000 years ago		By measuring rocks with a magnetometer			They drill them straight from the rock						Yes for more than 10 minutes	Agree				Maybe		In the last week
2019-07-03 06:12:44 -0400	5 of 9	55.55			The thing that makes a compass point north			Earth’s magnetic field in the past						The solid inner core		Hot churning liquid iron						Make volcanoes erupt			Two hundred and fifty million years ago		Never					By measuring rocks with a magnetometer						They collect them from the bottom of the ocean in a submarine	Not yet										In the last month
2019-07-03 06:03:29 -0400	6 of 9	66.66				All of the above		Earth’s magnetic field in the past						The solid inner core		Hot churning liquid iron						Make volcanoes erupt			Two hundred and fifty million years ago		Never							None of the above	They drill them straight from the rock				Not yet										In the last month
2019-07-03 05:56:48 -0400	9 of 9	100				All of the above		Earth’s magnetic field in the past			The liquid outer core					Hot churning liquid iron						Make volcanoes erupt			Two hundred and fifty million years ago					781,000 years ago		By measuring rocks with a magnetometer			They drill them straight from the rock						Yes for more than 10 minutes	Agree			Definitely
2019-07-03 05:48:52 -0400	8 of 9	88.88				All of the above		Earth’s magnetic field in the past			The liquid outer core					Hot churning liquid iron						Make volcanoes erupt				Two and a half billion years ago				781,000 years ago		By measuring rocks with a magnetometer			They drill them straight from the rock					Yes for less than 10 minutes		Agree				Maybe		In the last week
2019-07-03 05:32:28 -0400	7 of 9	77.77				All of the above		Earth’s magnetic field in the past						The solid inner core		Hot churning liquid iron					Protect satellites in space				Two hundred and fifty million years ago					781,000 years ago		By measuring rocks with a magnetometer			They drill them straight from the rock						Yes for more than 10 minutes	Agree				Maybe
2019-07-03 05:27:04 -0400	6 of 9	66.66				All of the above		Earth’s magnetic field in the past						The solid inner core		Hot churning liquid iron						Make volcanoes erupt				Two and a half billion years ago				781,000 years ago		By measuring rocks with a magnetometer						They collect them from the bottom of the ocean in a submarine		Yes for less than 10 minutes		Agree			Definitely			In the last week
2019-07-02 17:03:57 -0400	7 of 9	77.77				All of the above		Earth’s magnetic field in the past						The solid inner core		Hot churning liquid iron						Make volcanoes erupt			Two hundred and fifty million years ago				8250 years ago			By measuring rocks with a magnetometer			They drill them straight from the rock				Not yet							Maybe
2019-07-02 16:57:51 -0400	6 of 9	66.66				All of the above		Earth’s magnetic field in the past						The solid inner core		Hot churning liquid iron						Make volcanoes erupt				Two and a half billion years ago				781,000 years ago		By measuring rocks with a magnetometer					They go down a deep mine shaft		Not yet						Definitely			In the last week
2019-07-02 16:53:52 -0400	8 of 9	88.88				All of the above		Earth’s magnetic field in the past			The liquid outer core					Hot churning liquid iron						Make volcanoes erupt				Two and a half billion years ago				781,000 years ago		By measuring rocks with a magnetometer			They drill them straight from the rock						Yes for more than 10 minutes	Agree				Maybe		In the last week
2019-07-02 16:48:47 -0400	6 of 9	66.66				All of the above		Earth’s magnetic field in the past						The solid inner core		Hot churning liquid iron					Protect satellites in space					Two and a half billion years ago				781,000 years ago		By measuring rocks with a magnetometer			They drill them straight from the rock						Yes for more than 10 minutes	Agree				Maybe		In the last week
2019-07-02 16:44:28 -0400	9 of 9	100				All of the above		Earth’s magnetic field in the past			The liquid outer core					Hot churning liquid iron						Make volcanoes erupt			Two hundred and fifty million years ago					781,000 years ago		By measuring rocks with a magnetometer			They drill them straight from the rock						Yes for more than 10 minutes	Agree				Maybe		In the last week
2019-07-02 16:40:49 -0400	3 of 9	33.33	The thing that makes fridge magnets stick					Earth’s magnetic field in the past						The solid inner core		Hot churning liquid iron					Protect satellites in space					Two and a half billion years ago				781,000 years ago				None of the above				They collect them from the bottom of the ocean in a submarine		Yes for less than 10 minutes		Agree			Definitely			In the last week
2019-07-02 16:35:01 -0400	7 of 9	77.77				All of the above		Earth’s magnetic field in the past			The liquid outer core					Hot churning liquid iron						Make volcanoes erupt				Two and a half billion years ago				781,000 years ago		By measuring rocks with a magnetometer					They go down a deep mine shaft		Not yet						Definitely
2019-07-02 16:28:36 -0400	5 of 9	55.55				All of the above	Dinosaurs and fossils							The solid inner core		Hot churning liquid iron						Make volcanoes erupt				Two and a half billion years ago				781,000 years ago		By measuring rocks with a magnetometer					They go down a deep mine shaft		Not yet						Definitely
2019-07-02 16:23:18 -0400	6 of 9	66.66				All of the above		Earth’s magnetic field in the past						The solid inner core		Hot churning liquid iron						Make volcanoes erupt				Two and a half billion years ago				781,000 years ago				None of the above	They drill them straight from the rock				Not yet						Definitely			In the last week
2019-07-02 16:18:06 -0400	7 of 9	77.77				All of the above		Earth’s magnetic field in the past			The liquid outer core					Hot churning liquid iron						Make volcanoes erupt				Two and a half billion years ago			8250 years ago			By measuring rocks with a magnetometer			They drill them straight from the rock				Not yet						Definitely				In the last month
2019-07-02 16:08:37 -0400	5 of 9	55.55				All of the above		Earth’s magnetic field in the past					The hot rocky mantle			Hot churning liquid iron						Make volcanoes erupt				Two and a half billion years ago			8250 years ago		By looking at fossils with a microscope				They drill them straight from the rock				Not yet						Definitely			In the last week
2019-07-02 16:01:54 -0400	7 of 9	77.77				All of the above		Earth’s magnetic field in the past			The liquid outer core					Hot churning liquid iron						Make volcanoes erupt				Two and a half billion years ago				781,000 years ago		By measuring rocks with a magnetometer					They go down a deep mine shaft		Not yet						Definitely			In the last week
2019-07-02 15:55:45 -0400	6 of 9	66.66				All of the above		Earth’s magnetic field in the past						The solid inner core		Hot churning liquid iron						Make volcanoes erupt				Two and a half billion years ago			8250 years ago			By measuring rocks with a magnetometer			They drill them straight from the rock				Not yet						Definitely			In the last week
2019-07-02 15:49:27 -0400	6 of 9	66.66				All of the above		Earth’s magnetic field in the past						The solid inner core		Hot churning liquid iron					Protect satellites in space					Two and a half billion years ago				781,000 years ago		By measuring rocks with a magnetometer			They drill them straight from the rock				Not yet						Definitely				In the last month
2019-07-02 15:45:28 -0400	5 of 9	55.55			The thing that makes a compass point north			Earth’s magnetic field in the past			The liquid outer core					Hot churning liquid iron				Tell us about the inside of our planet				Two and a half million years ago						781,000 years ago		By measuring rocks with a magnetometer				They find them in a museum collection				Yes for less than 10 minutes		Agree				Maybe
2019-07-02 15:42:30 -0400	3 of 9	33.33		A force field around electric wires				Earth’s magnetic field in the past						The solid inner core		Hot churning liquid iron					Protect satellites in space			Two and a half million years ago					8250 years ago			By measuring rocks with a magnetometer					They go down a deep mine shaft		Not yet						Definitely
2019-07-02 15:36:12 -0400	7 of 9	77.77				All of the above		Earth’s magnetic field in the past			The liquid outer core					Hot churning liquid iron					Protect satellites in space				Two hundred and fifty million years ago					781,000 years ago		By measuring rocks with a magnetometer						They collect them from the bottom of the ocean in a submarine	Not yet						Definitely
2019-07-02 15:23:22 -0400	5 of 9	55.55				All of the above		Earth’s magnetic field in the past					The hot rocky mantle			Hot churning liquid iron					Protect satellites in space				Two hundred and fifty million years ago		Never					By measuring rocks with a magnetometer						They collect them from the bottom of the ocean in a submarine	Not yet						Definitely			In the last week
2019-07-02 15:12:04 -0400	9 of 9	100				All of the above		Earth’s magnetic field in the past			The liquid outer core					Hot churning liquid iron						Make volcanoes erupt			Two hundred and fifty million years ago					781,000 years ago		By measuring rocks with a magnetometer			They drill them straight from the rock				Not yet						Definitely
2019-07-02 15:06:41 -0400	7 of 9	77.77				All of the above		Earth’s magnetic field in the past						The solid inner core		Hot churning liquid iron						Make volcanoes erupt			Two hundred and fifty million years ago				8250 years ago			By measuring rocks with a magnetometer			They drill them straight from the rock				Not yet						Definitely				In the last month
2019-07-02 15:01:23 -0400	5 of 9	55.55				All of the above		Earth’s magnetic field in the past						The solid inner core				Rusty old lava				Make volcanoes erupt			Two hundred and fifty million years ago		Never					By measuring rocks with a magnetometer						They collect them from the bottom of the ocean in a submarine	Not yet							Maybe			In the last month
2019-07-02 14:56:02 -0400	6 of 9	66.66				All of the above		Earth’s magnetic field in the past						The solid inner core		Hot churning liquid iron						Make volcanoes erupt				Two and a half billion years ago		530 years ago				By measuring rocks with a magnetometer			They drill them straight from the rock				Not yet						Definitely				In the last month
2019-07-02 14:52:17 -0400	6 of 9	66.66				All of the above		Earth’s magnetic field in the past						The solid inner core		Hot churning liquid iron						Make volcanoes erupt				Two and a half billion years ago			8250 years ago			By measuring rocks with a magnetometer			They drill them straight from the rock				Not yet							Maybe		In the last week
2019-07-02 14:46:20 -0400	7 of 9	77.77				All of the above		Earth’s magnetic field in the past						The solid inner core		Hot churning liquid iron						Make volcanoes erupt				Two and a half billion years ago				781,000 years ago		By measuring rocks with a magnetometer			They drill them straight from the rock				Not yet						Definitely			In the last week
2019-07-02 14:41:28 -0400	6 of 9	66.66				All of the above		Earth’s magnetic field in the past						The solid inner core		Hot churning liquid iron						Make volcanoes erupt				Two and a half billion years ago			8250 years ago			By measuring rocks with a magnetometer			They drill them straight from the rock				Not yet						Definitely
2019-07-02 14:33:48 -0400	5 of 9	55.55			The thing that makes a compass point north			Earth’s magnetic field in the past			The liquid outer core					Hot churning liquid iron						Make volcanoes erupt			Two hundred and fifty million years ago				8250 years ago		By looking at fossils with a microscope							They collect them from the bottom of the ocean in a submarine	Not yet						Definitely			In the last week
2019-07-02 14:22:09 -0400	7 of 9	77.77				All of the above		Earth’s magnetic field in the past						The solid inner core		Hot churning liquid iron			Make compasses point north						Two hundred and fifty million years ago					781,000 years ago		By measuring rocks with a magnetometer			They drill them straight from the rock				Not yet							Maybe		In the last week
2019-07-02 14:18:20 -0400	9 of 9	100				All of the above		Earth’s magnetic field in the past			The liquid outer core					Hot churning liquid iron						Make volcanoes erupt			Two hundred and fifty million years ago					781,000 years ago		By measuring rocks with a magnetometer			They drill them straight from the rock						Yes for more than 10 minutes	Agree			Definitely			In the last week
2019-07-02 14:02:43 -0400	8 of 9	88.88				All of the above		Earth’s magnetic field in the past			The liquid outer core					Hot churning liquid iron					Protect satellites in space				Two hundred and fifty million years ago					781,000 years ago		By measuring rocks with a magnetometer			They drill them straight from the rock					Yes for less than 10 minutes			Neither agree nor disagree		Definitely			In the last week
2019-07-02 13:58:10 -0400	7 of 9	77.77				All of the above		Earth’s magnetic field in the past						The solid inner core		Hot churning liquid iron						Make volcanoes erupt				Two and a half billion years ago				781,000 years ago		By measuring rocks with a magnetometer			They drill them straight from the rock				Not yet						Definitely				In the last month
2019-07-02 13:51:39 -0400	8 of 9	88.88				All of the above		Earth’s magnetic field in the past			The liquid outer core					Hot churning liquid iron						Make volcanoes erupt			Two hundred and fifty million years ago			530 years ago				By measuring rocks with a magnetometer			They drill them straight from the rock						Yes for more than 10 minutes	Agree			Definitely				In the last month
2019-07-02 13:42:48 -0400	9 of 9	100				All of the above		Earth’s magnetic field in the past			The liquid outer core					Hot churning liquid iron						Make volcanoes erupt			Two hundred and fifty million years ago					781,000 years ago		By measuring rocks with a magnetometer			They drill them straight from the rock						Yes for more than 10 minutes	Agree			Definitely			In the last week
2019-07-02 13:28:22 -0400	8 of 9	88.88	The thing that makes fridge magnets stick					Earth’s magnetic field in the past			The liquid outer core					Hot churning liquid iron						Make volcanoes erupt			Two hundred and fifty million years ago					781,000 years ago		By measuring rocks with a magnetometer			They drill them straight from the rock				Not yet							Maybe		In the last week
2019-07-02 10:56:21 -0400	7 of 9	77.77				All of the above		Earth’s magnetic field in the past			The liquid outer core					Hot churning liquid iron						Make volcanoes erupt			Two hundred and fifty million years ago				8250 years ago			By measuring rocks with a magnetometer						They collect them from the bottom of the ocean in a submarine	Not yet						Definitely			In the last week
2019-07-02 10:48:02 -0400	3 of 9	33.33	The thing that makes fridge magnets stick				Dinosaurs and fossils							The solid inner core		Hot churning liquid iron						Make volcanoes erupt				Two and a half billion years ago	Never					By measuring rocks with a magnetometer					They go down a deep mine shaft			Yes for less than 10 minutes		Agree			Definitely
2019-07-02 10:38:57 -0400	6 of 9	66.66				All of the above		Earth’s magnetic field in the past						The solid inner core		Hot churning liquid iron						Make volcanoes erupt			Two hundred and fifty million years ago		Never					By measuring rocks with a magnetometer						They collect them from the bottom of the ocean in a submarine	Not yet						Definitely
2019-07-02 10:29:03 -0400	1 of 9	11.11				All of the above			The magnetic sense of birds					The solid inner core				Rusty old lava			Protect satellites in space					Two and a half billion years ago			8250 years ago					None of the above			They go down a deep mine shaft		Not yet						Definitely			In the last week
2019-07-02 10:23:35 -0400	4 of 9	44.44			The thing that makes a compass point north			Earth’s magnetic field in the past						The solid inner core			One big magnet					Make volcanoes erupt				Two and a half billion years ago				781,000 years ago		By measuring rocks with a magnetometer						They collect them from the bottom of the ocean in a submarine	Not yet						Definitely			In the last week
2019-07-02 10:06:52 -0400	5 of 9	55.55				All of the above	Dinosaurs and fossils							The solid inner core			One big magnet					Make volcanoes erupt				Two and a half billion years ago				781,000 years ago		By measuring rocks with a magnetometer			They drill them straight from the rock					Yes for less than 10 minutes		Agree				Maybe		In the last week
2019-07-02 09:51:47 -0400	5 of 9	55.55				All of the above		Earth’s magnetic field in the past						The solid inner core		Hot churning liquid iron			Make compasses point north							Two and a half billion years ago				781,000 years ago		By measuring rocks with a magnetometer						They collect them from the bottom of the ocean in a submarine	Not yet						Definitely
2019-07-02 09:45:00 -0400	7 of 9	77.77				All of the above		Earth’s magnetic field in the past						The solid inner core		Hot churning liquid iron						Make volcanoes erupt			Two hundred and fifty million years ago					781,000 years ago		By measuring rocks with a magnetometer					They go down a deep mine shaft		Not yet						Definitely			In the last week
2019-07-02 09:26:08 -0400	4 of 9	44.44				All of the above		Earth’s magnetic field in the past						The solid inner core			One big magnet				Protect satellites in space					Two and a half billion years ago				781,000 years ago				None of the above	They drill them straight from the rock				Not yet						Definitely
2019-07-02 09:19:31 -0400	6 of 9	66.66				All of the above		Earth’s magnetic field in the past					The hot rocky mantle			Hot churning liquid iron						Make volcanoes erupt				Two and a half billion years ago				781,000 years ago		By measuring rocks with a magnetometer						They collect them from the bottom of the ocean in a submarine			Yes for more than 10 minutes	Agree			Definitely			In the last week
2019-07-02 09:12:54 -0400	7 of 9	77.77				All of the above		Earth’s magnetic field in the past						The solid inner core		Hot churning liquid iron						Make volcanoes erupt			Two hundred and fifty million years ago				8250 years ago			By measuring rocks with a magnetometer			They drill them straight from the rock					Yes for less than 10 minutes		Agree				Maybe		In the last week
2019-07-02 09:02:50 -0400	5 of 9	55.55				All of the above		Earth’s magnetic field in the past						The solid inner core		Hot churning liquid iron			Make compasses point north						Two hundred and fifty million years ago					781,000 years ago				None of the above				They collect them from the bottom of the ocean in a submarine	Not yet							Maybe		In the last week
2019-07-02 08:49:57 -0400	2 of 9	22.22		A force field around electric wires					The magnetic sense of birds					The solid inner core		Hot churning liquid iron						Make volcanoes erupt				Two and a half billion years ago			8250 years ago					None of the above			They go down a deep mine shaft		Not yet							Maybe		In the last week
2019-07-02 08:45:00 -0400	7 of 9	77.77				All of the above		Earth’s magnetic field in the past			The liquid outer core					Hot churning liquid iron						Make volcanoes erupt			Two hundred and fifty million years ago				8250 years ago			By measuring rocks with a magnetometer						They collect them from the bottom of the ocean in a submarine		Yes for less than 10 minutes				Disagree	Definitely			In the last week
2019-07-02 08:41:45 -0400	6 of 9	66.66				All of the above		Earth’s magnetic field in the past						The solid inner core		Hot churning liquid iron						Make volcanoes erupt				Two and a half billion years ago				781,000 years ago		By measuring rocks with a magnetometer						They collect them from the bottom of the ocean in a submarine	Not yet						Definitely				In the last month
2019-07-02 08:37:55 -0400	7 of 9	77.77				All of the above		Earth’s magnetic field in the past			The liquid outer core					Hot churning liquid iron						Make volcanoes erupt			Two hundred and fifty million years ago			530 years ago				By measuring rocks with a magnetometer						They collect them from the bottom of the ocean in a submarine	Not yet						Definitely			In the last week
2019-07-02 08:28:11 -0400	6 of 9	66.66				All of the above		Earth’s magnetic field in the past			The liquid outer core					Hot churning liquid iron				Tell us about the inside of our planet						Two and a half billion years ago			8250 years ago			By measuring rocks with a magnetometer			They drill them straight from the rock				Not yet						Definitely
2019-07-02 08:17:21 -0400	7 of 9	77.77				All of the above		Earth’s magnetic field in the past					The hot rocky mantle			Hot churning liquid iron						Make volcanoes erupt				Two and a half billion years ago				781,000 years ago		By measuring rocks with a magnetometer			They drill them straight from the rock					Yes for less than 10 minutes		Agree			Definitely			In the last week
2019-07-02 08:11:29 -0400	2 of 9	22.22			The thing that makes a compass point north			Earth’s magnetic field in the past						The solid inner core		Hot churning liquid iron					Protect satellites in space					Two and a half billion years ago		530 years ago			By looking at fossils with a microscope						They go down a deep mine shaft			Yes for less than 10 minutes		Agree				Maybe
2019-07-02 07:58:47 -0400	5 of 9	55.55				All of the above		Earth’s magnetic field in the past						The solid inner core		Hot churning liquid iron						Make volcanoes erupt			Two hundred and fifty million years ago				8250 years ago					None of the above				They collect them from the bottom of the ocean in a submarine	Not yet						Definitely			In the last week
2019-07-02 07:38:30 -0400	4 of 9	44.44				All of the above		Earth’s magnetic field in the past						The solid inner core				Rusty old lava				Make volcanoes erupt				Two and a half billion years ago			8250 years ago			By measuring rocks with a magnetometer						They collect them from the bottom of the ocean in a submarine	Not yet							Maybe			In the last month
2019-07-02 07:30:26 -0400	7 of 9	77.77				All of the above		Earth’s magnetic field in the past						The solid inner core		Hot churning liquid iron						Make volcanoes erupt			Two hundred and fifty million years ago				8250 years ago			By measuring rocks with a magnetometer			They drill them straight from the rock					Yes for less than 10 minutes		Agree				Maybe			In the last month
2019-07-02 07:28:02 -0400	2 of 9	22.22		A force field around electric wires				Earth’s magnetic field in the past						The solid inner core		Hot churning liquid iron				Tell us about the inside of our planet						Two and a half billion years ago			8250 years ago				By reading maps of old explorers				They go down a deep mine shaft		Not yet							Maybe			In the last month
2019-07-02 07:16:36 -0400	5 of 9	55.55				All of the above		Earth’s magnetic field in the past						The solid inner core		Hot churning liquid iron						Make volcanoes erupt				Two and a half billion years ago			8250 years ago				By reading maps of old explorers		They drill them straight from the rock				Not yet						Definitely				In the last month
2019-07-02 07:05:35 -0400	8 of 9	88.88				All of the above		Earth’s magnetic field in the past			The liquid outer core					Hot churning liquid iron					Protect satellites in space				Two hundred and fifty million years ago					781,000 years ago		By measuring rocks with a magnetometer			They drill them straight from the rock						Yes for more than 10 minutes	Agree			Definitely			In the last week
2019-07-02 06:54:59 -0400	2 of 9	22.22			The thing that makes a compass point north			Earth’s magnetic field in the past						The solid inner core		Hot churning liquid iron					Protect satellites in space					Two and a half billion years ago			8250 years ago		By looking at fossils with a microscope							They collect them from the bottom of the ocean in a submarine	Not yet						Definitely				In the last month
2019-07-02 06:49:52 -0400	4 of 9	44.44			The thing that makes a compass point north			Earth’s magnetic field in the past						The solid inner core		Hot churning liquid iron				Tell us about the inside of our planet					Two hundred and fifty million years ago			530 years ago					By reading maps of old explorers		They drill them straight from the rock				Not yet							Maybe		In the last week
2019-07-02 06:46:20 -0400	7 of 9	77.77				All of the above		Earth’s magnetic field in the past						The solid inner core		Hot churning liquid iron				Tell us about the inside of our planet					Two hundred and fifty million years ago					781,000 years ago		By measuring rocks with a magnetometer			They drill them straight from the rock						Yes for more than 10 minutes	Agree				Maybe		In the last week
2019-07-02 06:42:35 -0400	7 of 9	77.77				All of the above		Earth’s magnetic field in the past			The liquid outer core					Hot churning liquid iron				Tell us about the inside of our planet						Two and a half billion years ago				781,000 years ago		By measuring rocks with a magnetometer			They drill them straight from the rock						Yes for more than 10 minutes	Agree				Maybe
2019-07-02 06:34:42 -0400	4 of 9	44.44				All of the above		Earth’s magnetic field in the past						The solid inner core		Hot churning liquid iron						Make volcanoes erupt				Two and a half billion years ago	Never							None of the above				They collect them from the bottom of the ocean in a submarine	Not yet						Definitely			In the last week
2019-07-02 06:29:51 -0400	7 of 9	77.77				All of the above		Earth’s magnetic field in the past						The solid inner core		Hot churning liquid iron						Make volcanoes erupt			Two hundred and fifty million years ago					781,000 years ago		By measuring rocks with a magnetometer					They go down a deep mine shaft				Yes for more than 10 minutes	Agree			Definitely				In the last month
2019-07-02 06:21:09 -0400	6 of 9	66.66				All of the above		Earth’s magnetic field in the past						The solid inner core		Hot churning liquid iron						Make volcanoes erupt			Two hundred and fifty million years ago				8250 years ago			By measuring rocks with a magnetometer						They collect them from the bottom of the ocean in a submarine	Not yet						Definitely			In the last week
2019-07-02 06:14:30 -0400	8 of 9	88.88				All of the above		Earth’s magnetic field in the past			The liquid outer core					Hot churning liquid iron						Make volcanoes erupt			Two hundred and fifty million years ago					781,000 years ago	By looking at fossils with a microscope				They drill them straight from the rock						Yes for more than 10 minutes	Agree			Definitely			In the last week
2019-07-02 05:56:46 -0400	8 of 9	88.88				All of the above		Earth’s magnetic field in the past			The liquid outer core					Hot churning liquid iron						Make volcanoes erupt			Two hundred and fifty million years ago					781,000 years ago		By measuring rocks with a magnetometer					They go down a deep mine shaft				Yes for more than 10 minutes	Agree				Maybe			In the last month
2019-07-02 05:50:30 -0400	7 of 9	77.77				All of the above		Earth’s magnetic field in the past						The solid inner core		Hot churning liquid iron					Protect satellites in space				Two hundred and fifty million years ago					781,000 years ago		By measuring rocks with a magnetometer			They drill them straight from the rock						Yes for more than 10 minutes	Agree			Definitely			In the last week
2019-07-02 05:37:58 -0400	3 of 9	33.33				All of the above		Earth’s magnetic field in the past						The solid inner core			One big magnet				Protect satellites in space					Two and a half billion years ago				781,000 years ago				None of the above				They collect them from the bottom of the ocean in a submarine			Yes for more than 10 minutes	Agree			Definitely			In the last week
2019-07-02 05:24:49 -0400	6 of 9	66.66			The thing that makes a compass point north			Earth’s magnetic field in the past						The solid inner core		Hot churning liquid iron						Make volcanoes erupt			Two hundred and fifty million years ago				8250 years ago			By measuring rocks with a magnetometer			They drill them straight from the rock						Yes for more than 10 minutes	Agree				Maybe		In the last week
2019-07-02 05:17:27 -0400	8 of 9	88.88				All of the above		Earth’s magnetic field in the past						The solid inner core		Hot churning liquid iron						Make volcanoes erupt			Two hundred and fifty million years ago					781,000 years ago		By measuring rocks with a magnetometer			They drill them straight from the rock						Yes for more than 10 minutes	Agree				Maybe		In the last week
2019-07-02 05:09:57 -0400	9 of 9	100				All of the above		Earth’s magnetic field in the past			The liquid outer core					Hot churning liquid iron						Make volcanoes erupt			Two hundred and fifty million years ago					781,000 years ago		By measuring rocks with a magnetometer			They drill them straight from the rock						Yes for more than 10 minutes	Agree				Maybe		In the last week
2019-07-01 12:56:10 -0400	6 of 9	66.66				All of the above		Earth’s magnetic field in the past						The solid inner core			One big magnet				Protect satellites in space				Two hundred and fifty million years ago					781,000 years ago		By measuring rocks with a magnetometer			They drill them straight from the rock						Yes for more than 10 minutes	Agree			Definitely			In the last week
2019-07-01 12:51:50 -0400	7 of 9	77.77				All of the above		Earth’s magnetic field in the past						The solid inner core		Hot churning liquid iron					Protect satellites in space				Two hundred and fifty million years ago					781,000 years ago		By measuring rocks with a magnetometer			They drill them straight from the rock					Yes for less than 10 minutes		Agree				Maybe		In the last week
2019-07-01 12:21:15 -0400	7 of 9	77.77				All of the above		Earth’s magnetic field in the past					The hot rocky mantle			Hot churning liquid iron					Protect satellites in space				Two hundred and fifty million years ago					781,000 years ago		By measuring rocks with a magnetometer			They drill them straight from the rock				Not yet						Definitely			In the last week
2019-07-01 12:15:36 -0400	8 of 9	88.88				All of the above		Earth’s magnetic field in the past						The solid inner core		Hot churning liquid iron						Make volcanoes erupt			Two hundred and fifty million years ago					781,000 years ago		By measuring rocks with a magnetometer			They drill them straight from the rock				Not yet						Definitely				In the last month
2019-07-01 11:59:58 -0400	8 of 9	88.88				All of the above		Earth’s magnetic field in the past			The liquid outer core					Hot churning liquid iron					Protect satellites in space				Two hundred and fifty million years ago					781,000 years ago		By measuring rocks with a magnetometer			They drill them straight from the rock					Yes for less than 10 minutes		Agree				Maybe		In the last week
2019-07-01 11:41:39 -0400	9 of 9	100				All of the above		Earth’s magnetic field in the past			The liquid outer core					Hot churning liquid iron						Make volcanoes erupt			Two hundred and fifty million years ago					781,000 years ago		By measuring rocks with a magnetometer			They drill them straight from the rock						Yes for more than 10 minutes	Agree			Definitely			In the last week
2019-07-01 11:36:30 -0400	7 of 9	77.77				All of the above		Earth’s magnetic field in the past					The hot rocky mantle			Hot churning liquid iron						Make volcanoes erupt			Two hundred and fifty million years ago					781,000 years ago		By measuring rocks with a magnetometer						They collect them from the bottom of the ocean in a submarine			Yes for more than 10 minutes	Agree			Definitely				In the last month
2019-07-01 11:26:06 -0400	4 of 9	44.44				All of the above		Earth’s magnetic field in the past						The solid inner core		Hot churning liquid iron						Make volcanoes erupt				Two and a half billion years ago			8250 years ago					None of the above			They go down a deep mine shaft		Not yet							Maybe		In the last week
2019-07-01 11:08:49 -0400	8 of 9	88.88				All of the above		Earth’s magnetic field in the past			The liquid outer core					Hot churning liquid iron						Make volcanoes erupt			Two hundred and fifty million years ago				8250 years ago			By measuring rocks with a magnetometer			They drill them straight from the rock					Yes for less than 10 minutes		Agree			Definitely			In the last week
2019-07-01 10:50:47 -0400	5 of 9	55.55				All of the above			The magnetic sense of birds					The solid inner core		Hot churning liquid iron						Make volcanoes erupt				Two and a half billion years ago			8250 years ago			By measuring rocks with a magnetometer			They drill them straight from the rock				Not yet						Definitely
2019-07-01 10:45:54 -0400	7 of 9	77.77				All of the above		Earth’s magnetic field in the past			The liquid outer core					Hot churning liquid iron						Make volcanoes erupt			Two hundred and fifty million years ago					781,000 years ago	By looking at fossils with a microscope							They collect them from the bottom of the ocean in a submarine			Yes for more than 10 minutes	Agree				Maybe			In the last month
2019-07-01 10:00:42 -0400	5 of 9	55.55				All of the above		Earth’s magnetic field in the past						The solid inner core				Rusty old lava				Make volcanoes erupt			Two hundred and fifty million years ago				8250 years ago			By measuring rocks with a magnetometer					They go down a deep mine shaft		Not yet						Definitely				In the last month
2019-07-01 09:51:21 -0400	7 of 9	77.77				All of the above		Earth’s magnetic field in the past						The solid inner core		Hot churning liquid iron						Make volcanoes erupt				Two and a half billion years ago				781,000 years ago		By measuring rocks with a magnetometer			They drill them straight from the rock					Yes for less than 10 minutes		Agree			Definitely
2019-07-01 09:46:05 -0400	7 of 9	77.77				All of the above		Earth’s magnetic field in the past						The solid inner core		Hot churning liquid iron						Make volcanoes erupt				Two and a half billion years ago				781,000 years ago		By measuring rocks with a magnetometer			They drill them straight from the rock					Yes for less than 10 minutes			Neither agree nor disagree		Definitely			In the last week
2019-07-01 09:40:35 -0400	2 of 9	22.22			The thing that makes a compass point north			Earth’s magnetic field in the past						The solid inner core		Hot churning liquid iron				Tell us about the inside of our planet						Two and a half billion years ago			8250 years ago					None of the above			They go down a deep mine shaft				Yes for more than 10 minutes	Agree			Definitely				In the last month
2019-07-01 09:34:24 -0400	4 of 9	44.44				All of the above		Earth’s magnetic field in the past						The solid inner core		Hot churning liquid iron			Make compasses point north							Two and a half billion years ago			8250 years ago			By measuring rocks with a magnetometer						They collect them from the bottom of the ocean in a submarine	Not yet						Definitely
2019-07-01 09:29:01 -0400	6 of 9	66.66				All of the above		Earth’s magnetic field in the past			The liquid outer core					Hot churning liquid iron						Make volcanoes erupt				Two and a half billion years ago			8250 years ago			By measuring rocks with a magnetometer					They go down a deep mine shaft				Yes for more than 10 minutes	Agree			Definitely			In the last week
2019-07-01 09:23:29 -0400	3 of 9	33.33				All of the above		Earth’s magnetic field in the past						The solid inner core			One big magnet					Make volcanoes erupt				Two and a half billion years ago	Never				By looking at fossils with a microscope							They collect them from the bottom of the ocean in a submarine	Not yet						Definitely			In the last week
2019-07-01 09:14:30 -0400	8 of 9	88.88				All of the above		Earth’s magnetic field in the past						The solid inner core		Hot churning liquid iron						Make volcanoes erupt			Two hundred and fifty million years ago					781,000 years ago		By measuring rocks with a magnetometer			They drill them straight from the rock				Not yet						Definitely			In the last week
2019-07-01 09:08:00 -0400	4 of 9	44.44				All of the above		Earth’s magnetic field in the past						The solid inner core			One big magnet					Make volcanoes erupt		Two and a half million years ago			Never					By measuring rocks with a magnetometer					They go down a deep mine shaft		Not yet							Maybe
2019-07-01 09:01:14 -0400	2 of 9	22.22				All of the above				Antique compasses				The solid inner core		Hot churning liquid iron					Protect satellites in space					Two and a half billion years ago		530 years ago						None of the above				They collect them from the bottom of the ocean in a submarine	Not yet						Definitely
2019-07-01 08:55:05 -0400	8 of 9	88.88				All of the above		Earth’s magnetic field in the past			The liquid outer core					Hot churning liquid iron						Make volcanoes erupt		Two and a half million years ago						781,000 years ago		By measuring rocks with a magnetometer			They drill them straight from the rock				Not yet						Definitely			In the last week
2019-07-01 08:48:22 -0400	8 of 9	88.88				All of the above		Earth’s magnetic field in the past			The liquid outer core					Hot churning liquid iron						Make volcanoes erupt				Two and a half billion years ago				781,000 years ago		By measuring rocks with a magnetometer			They drill them straight from the rock						Yes for more than 10 minutes		Neither agree nor disagree				Definitely not	In the last week
2019-07-01 08:41:32 -0400	9 of 9	100				All of the above		Earth’s magnetic field in the past			The liquid outer core					Hot churning liquid iron						Make volcanoes erupt			Two hundred and fifty million years ago					781,000 years ago		By measuring rocks with a magnetometer			They drill them straight from the rock					Yes for less than 10 minutes		Agree			Definitely			In the last week
2019-07-01 08:34:42 -0400	8 of 9	88.88				All of the above		Earth’s magnetic field in the past			The liquid outer core					Hot churning liquid iron						Make volcanoes erupt			Two hundred and fifty million years ago		Never					By measuring rocks with a magnetometer			They drill them straight from the rock					Yes for less than 10 minutes		Agree				Maybe		In the last week
2019-07-01 08:25:17 -0400	8 of 9	88.88				All of the above		Earth’s magnetic field in the past			The liquid outer core					Hot churning liquid iron						Make volcanoes erupt				Two and a half billion years ago				781,000 years ago		By measuring rocks with a magnetometer			They drill them straight from the rock						Yes for more than 10 minutes	Agree			Definitely			In the last week
2019-07-01 08:19:23 -0400	6 of 9	66.66				All of the above		Earth’s magnetic field in the past						The solid inner core		Hot churning liquid iron					Protect satellites in space					Two and a half billion years ago				781,000 years ago		By measuring rocks with a magnetometer			They drill them straight from the rock						Yes for more than 10 minutes	Agree			Definitely				In the last month
2019-07-01 08:16:08 -0400	8 of 9	88.88				All of the above		Earth’s magnetic field in the past			The liquid outer core					Hot churning liquid iron						Make volcanoes erupt			Two hundred and fifty million years ago					781,000 years ago		By measuring rocks with a magnetometer						They collect them from the bottom of the ocean in a submarine		Yes for less than 10 minutes		Agree				Maybe		In the last week
2019-07-01 08:07:47 -0400	3 of 9	33.33			The thing that makes a compass point north			Earth’s magnetic field in the past						The solid inner core		Hot churning liquid iron					Protect satellites in space			Two and a half million years ago					8250 years ago			By measuring rocks with a magnetometer						They collect them from the bottom of the ocean in a submarine	Not yet							Maybe			In the last month
2019-07-01 08:01:39 -0400	6 of 9	66.66				All of the above		Earth’s magnetic field in the past						The solid inner core				Rusty old lava				Make volcanoes erupt			Two hundred and fifty million years ago		Never					By measuring rocks with a magnetometer			They drill them straight from the rock				Not yet							Maybe		In the last week
2019-07-01 07:55:46 -0400	2 of 9	22.22		A force field around electric wires			Dinosaurs and fossils							The solid inner core		Hot churning liquid iron					Protect satellites in space				Two hundred and fifty million years ago				8250 years ago					None of the above				They collect them from the bottom of the ocean in a submarine	Not yet							Maybe
2019-07-01 07:52:29 -0400	9 of 9	100				All of the above		Earth’s magnetic field in the past			The liquid outer core					Hot churning liquid iron						Make volcanoes erupt			Two hundred and fifty million years ago					781,000 years ago		By measuring rocks with a magnetometer			They drill them straight from the rock						Yes for more than 10 minutes	Agree				Maybe		In the last week
2019-07-01 07:46:16 -0400	3 of 9	33.33				All of the above	Dinosaurs and fossils							The solid inner core		Hot churning liquid iron						Make volcanoes erupt				Two and a half billion years ago			8250 years ago		By looking at fossils with a microscope						They go down a deep mine shaft		Not yet							Maybe			In the last month
2019-07-01 07:39:36 -0400	4 of 9	44.44				All of the above		Earth’s magnetic field in the past						The solid inner core		Hot churning liquid iron				Tell us about the inside of our planet						Two and a half billion years ago	Never					By measuring rocks with a magnetometer					They go down a deep mine shaft		Not yet							Maybe
2019-07-01 07:33:21 -0400	5 of 9	55.55				All of the above		Earth’s magnetic field in the past						The solid inner core		Hot churning liquid iron				Tell us about the inside of our planet						Two and a half billion years ago				781,000 years ago		By measuring rocks with a magnetometer						They collect them from the bottom of the ocean in a submarine	Not yet						Definitely			In the last week
2019-07-01 07:30:14 -0400	8 of 9	88.88				All of the above		Earth’s magnetic field in the past			The liquid outer core					Hot churning liquid iron						Make volcanoes erupt				Two and a half billion years ago				781,000 years ago		By measuring rocks with a magnetometer			They drill them straight from the rock						Yes for more than 10 minutes	Agree				Maybe		In the last week
2019-07-01 07:26:36 -0400	5 of 9	55.55			The thing that makes a compass point north			Earth’s magnetic field in the past						The solid inner core		Hot churning liquid iron					Protect satellites in space				Two hundred and fifty million years ago		Never					By measuring rocks with a magnetometer			They drill them straight from the rock					Yes for less than 10 minutes		Agree				Maybe
2019-07-01 07:12:36 -0400	5 of 9	55.55				All of the above		Earth’s magnetic field in the past						The solid inner core	Lots of little magnets							Make volcanoes erupt			Two hundred and fifty million years ago					781,000 years ago				None of the above				They collect them from the bottom of the ocean in a submarine	Not yet						Definitely			In the last week
2019-07-01 07:06:05 -0400	4 of 9	44.44				All of the above		Earth’s magnetic field in the past						The solid inner core		Hot churning liquid iron				Tell us about the inside of our planet						Two and a half billion years ago	Never				By looking at fossils with a microscope				They drill them straight from the rock				Not yet							Maybe
2019-07-01 07:00:55 -0400	7 of 9	77.77				All of the above		Earth’s magnetic field in the past			The liquid outer core					Hot churning liquid iron						Make volcanoes erupt				Two and a half billion years ago			8250 years ago			By measuring rocks with a magnetometer			They drill them straight from the rock					Yes for less than 10 minutes		Agree				Maybe			In the last month
2019-07-01 06:55:09 -0400	6 of 9	66.66		A force field around electric wires				Earth’s magnetic field in the past						The solid inner core		Hot churning liquid iron						Make volcanoes erupt			Two hundred and fifty million years ago					781,000 years ago		By measuring rocks with a magnetometer					They go down a deep mine shaft		Not yet						Definitely			In the last week
2019-07-01 06:51:17 -0400	9 of 9	100				All of the above		Earth’s magnetic field in the past			The liquid outer core					Hot churning liquid iron						Make volcanoes erupt			Two hundred and fifty million years ago					781,000 years ago		By measuring rocks with a magnetometer			They drill them straight from the rock				Not yet						Definitely				In the last month
2019-07-01 06:47:16 -0400	4 of 9	44.44		A force field around electric wires				Earth’s magnetic field in the past						The solid inner core	Lots of little magnets					Tell us about the inside of our planet					Two hundred and fifty million years ago					781,000 years ago		By measuring rocks with a magnetometer						They collect them from the bottom of the ocean in a submarine		Yes for less than 10 minutes		Agree				Maybe			In the last month
2019-07-01 06:38:41 -0400	8 of 9	88.88				All of the above		Earth’s magnetic field in the past			The liquid outer core					Hot churning liquid iron					Protect satellites in space				Two hundred and fifty million years ago					781,000 years ago		By measuring rocks with a magnetometer			They drill them straight from the rock				Not yet						Definitely			In the last week
2019-07-01 06:33:20 -0400	4 of 9	44.44			The thing that makes a compass point north			Earth’s magnetic field in the past						The solid inner core		Hot churning liquid iron						Make volcanoes erupt				Two and a half billion years ago			8250 years ago				By reading maps of old explorers		They drill them straight from the rock				Not yet						Definitely				In the last month
2019-07-01 06:28:19 -0400	7 of 9	77.77				All of the above		Earth’s magnetic field in the past						The solid inner core		Hot churning liquid iron						Make volcanoes erupt				Two and a half billion years ago				781,000 years ago		By measuring rocks with a magnetometer			They drill them straight from the rock				Not yet						Definitely
2019-07-01 06:23:51 -0400	7 of 9	77.77				All of the above		Earth’s magnetic field in the past						The solid inner core		Hot churning liquid iron						Make volcanoes erupt			Two hundred and fifty million years ago					781,000 years ago		By measuring rocks with a magnetometer					They go down a deep mine shaft		Not yet						Definitely			In the last week
2019-07-01 06:20:54 -0400	5 of 9	55.55				All of the above		Earth’s magnetic field in the past						The solid inner core		Hot churning liquid iron						Make volcanoes erupt				Two and a half billion years ago	Never					By measuring rocks with a magnetometer						They collect them from the bottom of the ocean in a submarine	Not yet						Definitely
2019-07-01 06:12:58 -0400	5 of 9	55.55				All of the above		Earth’s magnetic field in the past						The solid inner core			One big magnet					Make volcanoes erupt			Two hundred and fifty million years ago					781,000 years ago	By looking at fossils with a microscope					They find them in a museum collection				Yes for less than 10 minutes		Agree			Definitely			In the last week
2019-07-01 06:06:10 -0400	6 of 9	66.66				All of the above		Earth’s magnetic field in the past			The liquid outer core					Hot churning liquid iron						Make volcanoes erupt				Two and a half billion years ago			8250 years ago			By measuring rocks with a magnetometer					They go down a deep mine shaft		Not yet						Definitely			In the last week
[truncated: 3 more columns]
